# Supplementary material for: Vesicle Size Distribution as a Novel Nuclear Forensics Tool
Source: PLoS One. 2016 Sep 22;11(9):e0163516. doi: 10.1371/journal.pone.0163516 (PMC5033408; doi:10.1371/journal.pone.0163516)
Supplement: S1 Table — (XLS) [file pone.0163516.s001.xls]

## Sheet: TableS1
4F 5.37									5A 6.06									TS1
	Major Axis	Minor Axis	Area	Angle from horizontal						Major Axis	Minor Axis	Area	Angle from horizontal						Major Axis	Minor Axis	Area	Angle from horizontal
	mm	mm	mm2	degrees						mm	mm	mm2	degrees						mm	mm	mm2	degrees
Sample	24.289	7.668	146.286	10					Sample	22.845	9.858	176.867	22					Sample	24.574	10.517	203.059	3.5
Vesicles									Vesicles									Vesicles
X	Y	Major Axis	Minor Axis	Area	Roundness	Long axis angle			X	Y	Major Axis	Minor Axis	Area	Roundness	Long axis angle			X	Y	Major Axis	Minor Axis	Area	Roundness	Long axis angle
center	center	mm	mm	mm2		degrees			center	center	mm	mm	mm2		degrees			center	center	mm	mm	mm2		degrees
22.258	0.652	0.065	0.059	0.003	0.904075	42.758			16.663	0.794	0.629	0.502	0.248	0.798106	128.87			4.246	0.606	0.09	0.088	0.006	0.94314	42.532
6.121	0.699	0.03	0.029	0.0006876	0.972755	134.989			16.286	0.625	0.08	0.076	0.005	0.994718	24.259			3.48	0.639	0.061	0.049	0.002	0.684353	131.603
7.546	0.722	0.03	0.027	0.0006347	0.897917	0			14.79	0.746	0.247	0.145	0.028	0.584352	43.354			8.918	0.736	0.158	0.137	0.017	0.867051	7.549
3.615	0.803	0.052	0.045	0.002	0.941745	176.465			17.32	0.682	0.068	0.051	0.003	0.826064	0.281			9.057	0.695	0.052	0.044	0.002	0.941745	55.928
6.118	0.837	0.045	0.04	0.001	0.62876	173.064			15.066	0.746	0.1	0.089	0.007	0.891268	161.792			2.49	0.908	0.488	0.445	0.17	0.908907	9.553
5.576	0.945	0.029	0.026	0.0005818	0.880821	90			17.414	0.803	0.147	0.127	0.015	0.883826	98.843			10.168	0.729	0.059	0.054	0.002	0.731537	16.895
4.512	0.992	0.031	0.028	0.0006876	0.911009	117.409			14.93	0.804	0.095	0.076	0.006	0.846475	30.175			3.681	0.775	0.101	0.094	0.007	0.873706	166.607
5.269	1.005	0.058	0.052	0.002	0.75698	8.235			18.65	1.147	0.687	0.538	0.29	0.782338	80.79			7.883	0.872	0.243	0.237	0.045	0.970309	136.858
5.086	0.997	0.037	0.031	0.0008992	0.836302	9.605			17.583	0.879	0.113	0.089	0.008	0.797707	179.717			9.096	0.777	0.042	0.037	0.001	0.721791	73.031
6.579	1.003	0.031	0.029	0.000714	0.945987	45			17.298	0.884	0.058	0.052	0.002	0.75698	160.945			5.653	0.861	0.143	0.112	0.013	0.809434	175.551
10.848	1.011	0.031	0.031	0.0007405	0.981097	90			18.158	0.895	0.071	0.053	0.003	0.75773	40.372			6.066	0.882	0.12	0.095	0.009	0.795775	138.095
22.297	1.017	0.029	0.026	0.0005818	0.880821	59.743			17.709	0.926	0.088	0.067	0.005	0.822081	173.678			3.381	0.97	0.053	0.046	0.002	0.906543	136.454
7.514	1.174	0.35	0.314	0.087	0.90426	135.233			17.386	0.963	0.057	0.05	0.002	0.783773	175.079			3.729	1.164	0.275	0.258	0.056	0.942829	160.633
10.103	1.045	0.066	0.059	0.003	0.876887	10.473			17.811	1.009	0.112	0.085	0.008	0.812015	167.935			14.676	1.166	0.255	0.214	0.043	0.841973	175.211
10.996	1.063	0.071	0.063	0.004	1.01031	42.321			16.808	2.587	3.103	2.322	5.659	0.748318	47.279			1.521	1.159	0.217	0.148	0.025	0.675975	167.178
21.433	1.044	0.029	0.028	0.0006347	0.96091	2.345e-12			14.433	1.154	0.259	0.22	0.045	0.854128	143.837			14.015	1.28	0.472	0.402	0.149	0.851554	4.953
15.676	1.067	0.062	0.054	0.003	0.993683	136.455			18.262	1.216	0.162	0.13	0.017	0.824763	75.604			13.702	1.168	0.104	0.092	0.007	0.824027	5.271
4.489	1.085	0.054	0.048	0.002	0.873278	46.645			13.928	1.182	0.055	0.038	0.002	0.841811	177.355			17.145	1.185	0.066	0.05	0.003	0.876887	78.001
15.533	1.084	0.031	0.029	0.000714	0.945987	90			13.71	1.28	0.078	0.068	0.004	0.837107	47.1			17.274	1.216	0.108	0.079	0.007	0.764118	17.233
10.251	1.105	0.069	0.06	0.003	0.802293	111.275			14.1	1.303	0.116	0.105	0.01	0.946224	58.1			3.401	1.276	0.215	0.202	0.034	0.936509	172.189
16.511	1.106	0.028	0.026	0.0005818	0.944861	80.707			15.027	1.307	0.116	0.1	0.009	0.851602	120.133			16.907	1.318	0.221	0.193	0.033	0.860279	19.382
5.611	1.145	0.03	0.03	0.0006876	0.972755	0			13.994	1.293	0.069	0.062	0.003	0.802293	101.487			2.982	1.285	0.083	0.081	0.005	0.924111	6.583e-13
22.784	1.185	0.068	0.067	0.004	1.10142	125.941			14.61	1.619	0.613	0.494	0.238	0.806429	54.937			8.959	1.276	0.064	0.049	0.002	0.621699	132.109
6.737	1.418	0.567	0.506	0.225	0.8911	4.212			18.021	1.349	0.071	0.061	0.003	0.75773	178.629			13.658	1.28	0.046	0.044	0.002	1.20344	89.714
4.956	1.196	0.034	0.03	0.0007934	0.873865	153.353			13.56	1.364	0.079	0.068	0.004	0.816048	164.411			19.339	1.299	0.05	0.044	0.002	1.01859	58.344
16.552	1.204	0.051	0.044	0.002	0.979038	165.667			13.827	1.439	0.081	0.072	0.005	0.970309	20.016			6.376	1.46	0.377	0.349	0.103	0.922709	3.396
5.431	1.25	0.106	0.093	0.008	0.906543	28.804			13.544	1.58	0.264	0.227	0.047	0.858618	172.8			18.192	1.336	0.109	0.095	0.008	0.857328	59.063
5.715	1.236	0.038	0.038	0.001	0.881745	94.764			18.944	1.546	0.13	0.113	0.011	0.828736	143.729			9.223	1.349	0.13	0.128	0.013	0.979415	111.622
5.345	1.248	0.031	0.03	0.0007273	0.963608	52.854			18.085	1.539	0.061	0.05	0.002	0.684353	89.245			14.986	1.311	0.055	0.044	0.002	0.841811	29.118
4.276	1.265	0.03	0.028	0.0006612	0.935407	45.004			18.453	1.572	0.074	0.07	0.004	0.930051	5.577			17.554	1.353	0.12	0.103	0.01	0.884194	5.63
6.312	1.268	0.032	0.029	0.0007273	0.904323	121.56			14.25	1.596	0.077	0.071	0.004	0.858991	49.487			16.037	1.429	0.175	0.164	0.023	0.956229	167.416
22.866	1.3	0.084	0.082	0.005	0.902239	39.569			13.155	1.64	0.081	0.074	0.005	0.970309	97.802			14.939	1.409	0.124	0.111	0.011	0.910876	43.537
12.424	1.369	0.116	0.107	0.01	0.946224	54.308			15.471	1.776	0.393	0.297	0.092	0.758425	17.166			10.5	1.694	0.722	0.662	0.376	0.918382	158.762
5.349	1.332	0.029	0.028	0.0006347	0.96091	2.345e-12			14.902	1.737	0.142	0.108	0.012	0.75773	50.983			19.289	1.406	0.081	0.075	0.005	0.970309	57.542
21.944	1.34	0.042	0.031	0.001	0.721791	159.945			18.803	1.769	0.17	0.145	0.019	0.837078	67.287			15.7	1.426	0.08	0.074	0.005	0.994718	149.173
2.722	1.349	0.047	0.046	0.002	1.15277	28.619			12.449	1.849	0.088	0.082	0.006	0.986498	17.18			17.465	1.451	0.116	0.108	0.01	0.946224	171.328
4.542	1.383	0.137	0.118	0.013	0.881886	168.647			13.613	3.015	2.83	2.247	4.994	0.793937	15.71			14.662	1.498	0.223	0.193	0.034	0.870521	22.007
4.948	1.341	0.029	0.026	0.000595	0.900806	45.002			18.186	1.872	0.103	0.099	0.008	0.96012	101.998			21.407	1.436	0.056	0.049	0.002	0.812015	135.02
8.643	1.445	0.272	0.245	0.052	0.894902	178.218			18.591	1.878	0.096	0.082	0.006	0.828932	158.122			13.67	1.448	0.063	0.056	0.003	0.962388	4.597
4.873	1.422	0.176	0.161	0.022	0.904289	173.771			12.201	1.973	0.06	0.052	0.002	0.707355	124.257			17.178	1.527	0.265	0.211	0.044	0.797758	4.539
5.065	1.355	0.028	0.026	0.0005818	0.944861	9.293			15.134	2.008	0.07	0.063	0.003	0.779534	111.85			6.764	1.507	0.176	0.153	0.021	0.863185	178.716
14.248	1.421	0.057	0.051	0.002	0.783773	82.85			12.872	2.024	0.091	0.084	0.006	0.922526	89.861			21.619	1.499	0.142	0.127	0.014	0.884019	76.124
4.258	1.42	0.029	0.026	0.000595	0.900806	167.793			15.233	2.062	0.096	0.087	0.007	0.967087	157.771			13.887	1.509	0.067	0.061	0.003	0.850906	46.755
22.953	1.436	0.03	0.029	0.0006876	0.972755	45			12.471	2.052	0.055	0.05	0.002	0.841811	75.819			7.105	1.573	0.168	0.16	0.021	0.947351	45.566
5.308	1.452	0.045	0.038	0.001	0.62876	72.598			14.656	2.089	0.061	0.052	0.002	0.684353	127.357			17.662	1.566	0.142	0.136	0.015	0.947163	30.399
7.182	1.464	0.075	0.072	0.004	0.905415	129.019			12	2.135	0.052	0.044	0.002	0.941745	52.675			21.316	1.617	0.172	0.16	0.022	0.946838	35.32
4.312	1.448	0.031	0.029	0.000714	0.945987	45			18.458	2.196	0.109	0.091	0.008	0.857328	178.014			13.957	1.598	0.08	0.07	0.004	0.795775	61.788
23.025	1.453	0.034	0.03	0.0007934	0.873865	90			12.139	2.231	0.086	0.071	0.005	0.860762	73.609			2.807	1.671	0.216	0.208	0.035	0.955148	62.138
2.907	1.487	0.092	0.084	0.006	0.90258	100.238			12.294	2.381	0.318	0.296	0.074	0.931725	178.046			13.81	1.608	0.059	0.054	0.003	1.0973	169
5.669	1.497	0.117	0.097	0.009	0.837107	9.726			12.056	2.269	0.066	0.054	0.003	0.876887	73.589			14.234	1.644	0.09	0.083	0.006	0.94314	151.129
22.778	1.538	0.092	0.073	0.005	0.75215	151.862			18.493	2.288	0.07	0.058	0.003	0.779534	0			17.825	1.647	0.089	0.076	0.005	0.803711	78.528
3.287	1.521	0.039	0.031	0.0009653	0.808059	151.435			15.018	2.492	0.161	0.118	0.015	0.7368	177.69			13.079	1.65	0.081	0.08	0.005	0.970309	2.499
14.656	1.584	0.142	0.132	0.015	0.947163	175.775			11.539	2.507	0.052	0.043	0.002	0.941745	28.744			8.208	1.667	0.084	0.08	0.005	0.902239	121.939
5.532	1.557	0.06	0.052	0.002	0.707355	18.958			18.157	2.571	0.08	0.069	0.004	0.795775	138.943			5.758	1.824	0.398	0.388	0.121	0.972589	153.983
7.237	1.559	0.048	0.043	0.002	1.10524	20.117			11.407	2.706	0.074	0.056	0.003	0.697538	63.005			18.988	1.812	0.387	0.344	0.105	0.892642	162.281
22.615	1.575	0.059	0.057	0.003	1.0973	163.523			11.242	2.705	0.061	0.046	0.002	0.684353	59.018			21.857	1.703	0.132	0.122	0.013	0.949961	24.706
22.726	1.844	0.527	0.507	0.21	0.962738	37.585			11.309	2.717	0.051	0.048	0.002	0.979038	98.08			7.464	1.787	0.3	0.275	0.065	0.919562	11.963
11.556	1.615	0.055	0.048	0.002	0.841811	45.005			15.211	2.836	0.155	0.131	0.016	0.847943	141.07			13.744	1.689	0.055	0.03	0.001	0.420906	43.303
5.768	1.707	0.265	0.225	0.047	0.85215	3.953			11.462	2.907	0.063	0.057	0.003	0.962388	164.423			15.782	1.735	0.099	0.083	0.006	0.779455	39.895
9.169	1.781	0.398	0.363	0.114	0.916324	7.74			11.281	2.985	0.146	0.112	0.013	0.776511	162.06			19.922	1.79	0.21	0.191	0.031	0.895021	28.89
13.421	1.646	0.059	0.055	0.003	1.0973	51.514			12.072	3.03	0.121	0.114	0.011	0.956604	38.906			2.283	1.747	0.059	0.042	0.002	0.731537	95.535
5.525	1.664	0.062	0.056	0.003	0.993683	43.616			11.031	3.035	0.063	0.055	0.003	0.962388	167.17			22.235	1.796	0.171	0.152	0.02	0.870859	141.527
11.645	1.727	0.21	0.089	0.015	0.433075	140.454			10.527	3.144	0.072	0.065	0.004	0.982438	144.762			19.698	1.818	0.166	0.152	0.02	0.924111	170.493
16.031	2.011	0.784	0.687	0.423	0.87623	6.04			10.193	3.194	0.064	0.051	0.003	0.932548	10.249			14.27	1.789	0.073	0.058	0.003	0.71678	56.381
4.211	1.696	0.029	0.026	0.000595	0.900806	167.793			10.337	3.308	0.278	0.254	0.055	0.906115	16.539			9.421	1.985	0.508	0.444	0.177	0.873285	167.883
6.585	1.713	0.059	0.045	0.002	0.731537	172.817			11.241	3.343	0.149	0.129	0.015	0.860258	137.624			18.285	1.824	0.085	0.066	0.004	0.704908	51.318
13.525	1.72	0.037	0.032	0.0009388	0.873132	65.26			10.876	3.387	0.108	0.089	0.008	0.873278	63.773			5.02	1.838	0.106	0.079	0.007	0.793225	105.11
11.847	1.727	0.052	0.045	0.002	0.941745	0.763			9.361	3.423	0.102	0.078	0.006	0.734279	74.959			9.812	1.825	0.081	0.066	0.004	0.776247	84.03
5.16	1.735	0.059	0.046	0.002	0.731537	4.057			10.701	3.436	0.126	0.089	0.009	0.721791	164.957			8.684	1.908	0.213	0.2	0.033	0.926115	32.271
6.709	1.774	0.095	0.092	0.007	0.987554	86.609			11.133	3.422	0.06	0.054	0.003	1.06103	178.553			0.9	1.86	0.046	0.043	0.002	1.20344	97.645
3.462	1.745	0.032	0.032	0.0007934	0.986512	0			12.108	3.425	0.063	0.051	0.002	0.641592	7.295			12.388	2.52	2.137	1.282	2.152	0.599989	175.907
4.494	1.745	0.031	0.031	0.0007405	0.981097	90			10.871	3.491	0.08	0.079	0.005	0.994718	124.641			17.321	1.853	0.037	0.035	0.001	0.930051	111.225
12.225	2.326	1.224	1.169	1.124	0.955242	165.94			9.43	3.509	0.11	0.105	0.009	0.947038	48.254			0.577	1.933	0.144	0.125	0.014	0.859633	17.365
4.575	1.792	0.051	0.044	0.002	0.979038	165.448			11.29	3.498	0.072	0.059	0.003	0.736828	106.949			11.044	1.983	0.193	0.165	0.025	0.854546	156.683
9.647	1.799	0.06	0.06	0.003	1.06103	0			9.91	3.497	0.077	0.059	0.004	0.858991	158.335			6.234	1.93	0.049	0.04	0.002	1.06059	101.719
4.45	1.858	0.128	0.108	0.011	0.854836	0.273			9.792	3.54	0.152	0.133	0.016	0.881745	152.13			13.79	2.02	0.251	0.229	0.045	0.909442	6.249
5.232	1.83	0.03	0.029	0.0006876	0.972755	25.979			11.596	3.6	0.106	0.083	0.007	0.793225	70.313			6.879	2.062	0.249	0.235	0.046	0.944646	79.819
23.042	1.84	0.041	0.036	0.001	0.75743	9.524			17.988	3.621	0.127	0.11	0.011	0.868351	107.168			18.597	1.984	0.049	0.041	0.002	1.06059	18.777
4.549	1.84	0.03	0.029	0.0006744	0.954081	66.801			9.018	3.604	0.067	0.06	0.003	0.850906	60.217			17.718	2.028	0.088	0.071	0.005	0.822081	155.678
3.527	1.89	0.132	0.124	0.013	0.949961	167.281			15.04	3.663	0.192	0.17	0.026	0.89801	159.379			18.704	2.047	0.083	0.078	0.005	0.924111	4.416
6.782	1.878	0.077	0.067	0.004	0.858991	16.94			8.943	3.655	0.054	0.051	0.002	0.873278	171.569			7.079	2.058	0.047	0.042	0.002	1.15277	91.248
2.272	1.886	0.076	0.073	0.004	0.881745	39.281			17.723	3.68	0.068	0.058	0.003	0.826064	4.862			19.293	2.12	0.153	0.143	0.017	0.924647	87.645
7.459	1.899	0.075	0.069	0.004	0.905415	173.368			8.266	3.685	0.077	0.059	0.004	0.858991	165.492			7.47	2.127	0.161	0.148	0.019	0.93328	3.893
13.951	1.948	0.182	0.164	0.023	0.884087	13.09			8.377	3.733	0.093	0.083	0.006	0.883274	167.109			14.544	2.217	0.233	0.199	0.036	0.844308	29.736
8.757	2	0.286	0.25	0.056	0.871698	18.58			8.168	3.74	0.079	0.055	0.003	0.612036	4.609			7.369	2.153	0.056	0.042	0.002	0.812015	101.953
2.879	1.905	0.056	0.052	0.002	0.812015	134.988			9.102	3.938	0.405	0.352	0.112	0.869397	176.158			7.821	2.226	0.228	0.199	0.036	0.881745	177.311
3.72	1.897	0.029	0.028	0.0006347	0.96091	180			8.044	3.903	0.252	0.223	0.044	0.882189	56.885			8.039	2.184	0.124	0.115	0.011	0.910876	50.79
4.558	1.915	0.025	0.023	0.0004496	0.915918	160.873			8.427	3.873	0.178	0.167	0.023	0.924268	178.881			15.311	2.153	0.062	0.056	0.003	0.993683	49.824
12.707	1.924	0.052	0.044	0.002	0.941745	20.733			11.826	3.856	0.126	0.09	0.009	0.721791	87.565			2.705	2.192	0.071	0.059	0.003	0.75773	26.099
5.031	1.931	0.045	0.04	0.001	0.62876	85.019			8.747	3.853	0.085	0.08	0.005	0.881135	172.857			18.876	2.194	0.043	0.041	0.001	0.68861	101.94
4.807	2.044	0.235	0.227	0.042	0.968331	131.549			17.62	3.863	0.1	0.093	0.007	0.891268	5.271			7.173	2.205	0.052	0.037	0.001	0.470873	63.645
11.439	1.963	0.026	0.024	0.000476	0.896541	154.452			14.661	3.861	0.065	0.061	0.003	0.904075	50.77			16.284	2.252	0.076	0.059	0.004	0.881745	61.399
21.799	1.982	0.033	0.03	0.0007669	0.896646	13.024			15.287	3.915	0.171	0.16	0.021	0.914402	146.994			17.188	2.267	0.105	0.091	0.008	0.923893	15.428
3.451	2.044	0.125	0.12	0.012	0.977848	83.036			14.806	3.903	0.078	0.068	0.004	0.837107	99.082			19.428	2.265	0.095	0.085	0.006	0.846475	71.86
4.107	2.001	0.025	0.023	0.0004496	0.915918	70.873			7.686	3.977	0.224	0.199	0.035	0.888141	136.556			4.124	2.312	0.154	0.147	0.018	0.966365	30.719
11.399	2.003	0.03	0.029	0.0006876	0.972755	134.989			17.953	3.908	0.054	0.047	0.002	0.873278	50.118			7.1	2.344	0.213	0.199	0.033	0.926115	44.054
6.709	2.008	0.031	0.028	0.0007008	0.928498	37.768			6.848	4.029	0.108	0.065	0.006	0.654959	104.822			19.247	2.274	0.045	0.04	0.001	0.62876	88.873
1.985	2.092	0.215	0.195	0.033	0.908965	169.591			12.755	4.017	0.074	0.064	0.004	0.930051	175.537			5.41	2.292	0.063	0.057	0.003	0.962388	80.613
8.533	2.022	0.045	0.039	0.001	0.62876	0			17.744	4.063	0.069	0.043	0.002	0.534862	87.573			9.631	2.311	0.059	0.049	0.002	0.731537	99.458
8.173	2.073	0.139	0.122	0.013	0.85669	12.456			8.072	4.074	0.094	0.074	0.005	0.720484	16.387			7.507	2.318	0.061	0.058	0.003	1.02653	105.474
6.344	2.037	0.046	0.038	0.001	0.60172	64.098			15.075	4.1	0.079	0.069	0.004	0.816048	108.771			16.246	2.364	0.043	0.03	0.001	0.68861	96.422
11.093	2.08	0.115	0.111	0.01	0.962752	68.312			16.965	4.113	0.092	0.076	0.006	0.90258	143.017			7.647	2.404	0.132	0.119	0.012	0.876887	4.467
15.547	2.051	0.053	0.045	0.002	0.906543	58.38			6.593	4.151	0.133	0.092	0.01	0.719792	111.21			6.563	2.406	0.094	0.081	0.006	0.864581	39.277
11.399	2.121	0.219	0.175	0.03	0.796422	4.341			11.653	4.24	0.235	0.183	0.034	0.783887	166.714			20.897	2.397	0.076	0.064	0.004	0.881745	168.028
5.717	2.054	0.039	0.031	0.0009388	0.785876	165.368			14.429	4.298	0.353	0.299	0.083	0.848084	152.572			14.677	2.499	0.3	0.237	0.056	0.792238	160.221
7.555	2.109	0.113	0.108	0.01	0.997133	142.802			18.029	4.17	0.052	0.049	0.002	0.941745	62.044			18.936	2.477	0.178	0.172	0.024	0.964454	43.966
22.944	2.085	0.028	0.026	0.0005686	0.923423	135			6.808	4.28	0.221	0.188	0.033	0.860279	95.306			7.264	2.488	0.178	0.165	0.023	0.924268	26.561
3.598	2.095	0.029	0.026	0.0005818	0.880821	90			17.975	4.279	0.144	0.102	0.011	0.675426	73.717			17.595	2.493	0.163	0.157	0.02	0.95844	138.671
21.811	2.105	0.052	0.045	0.002	0.941745	0			18.407	4.454	0.433	0.28	0.095	0.645146	50.784			6.206	2.537	0.134	0.128	0.013	0.921815	44.761
18.256	2.153	0.069	0.069	0.004	1.06972	90			8.196	4.394	0.058	0.049	0.002	0.75698	18.029			10.199	2.584	0.119	0.11	0.01	0.899117	104.971
3.588	2.163	0.064	0.062	0.003	0.932548	128.034			11.699	4.445	0.118	0.113	0.01	0.914421	97.097			7.894	2.569	0.046	0.04	0.001	0.60172	104.628
22.713	2.145	0.03	0.029	0.0006876	0.972755	45			6.071	4.608	0.403	0.338	0.107	0.838849	18.42			3.889	2.586	0.073	0.068	0.004	0.955706	153.277
6.414	2.173	0.038	0.037	0.001	0.881745	12.821			5.702	4.53	0.244	0.206	0.04	0.855442	176.876			13.688	2.582	0.056	0.05	0.002	0.812015	108.259
5.073	2.187	0.049	0.041	0.002	1.06059	141.882			18.702	4.553	0.277	0.226	0.049	0.813105	35.455			4.696	2.763	0.399	0.358	0.112	0.895741	4.526
8.962	2.176	0.03	0.027	0.0006347	0.897917	4.762			18.95	4.686	0.382	0.197	0.059	0.514796	54.072			23.961	2.622	0.091	0.072	0.005	0.768772	38.351
10.845	2.254	0.179	0.138	0.019	0.755019	22.798			19.228	4.668	0.162	0.111	0.014	0.679216	73.286			2.294	2.634	0.062	0.051	0.003	0.993683	161.729
13.062	2.272	0.188	0.175	0.026	0.936629	132.438			10.399	4.638	0.085	0.076	0.005	0.881135	9.132			18.355	2.742	0.202	0.173	0.027	0.842502	5.018
3.855	2.204	0.035	0.035	0.0009521	0.989593	0			5.5	4.859	0.473	0.435	0.162	0.92194	0.784			20.825	2.705	0.065	0.054	0.003	0.904075	88.471
5.992	2.213	0.059	0.055	0.003	1.0973	177.777			6.395	4.967	0.649	0.546	0.278	0.84036	171.283			17.754	2.758	0.136	0.13	0.014	0.963741	55.008
5.931	2.222	0.045	0.044	0.002	1.25752	114.444			18.368	4.723	0.127	0.106	0.011	0.868351	26.431			19.056	2.846	0.293	0.267	0.062	0.919531	154.026
5.414	2.22	0.03	0.028	0.0006479	0.916591	2.046			15.438	4.745	0.058	0.047	0.002	0.75698	2.703			7.941	2.854	0.098	0.09	0.007	0.928017	64.912
2.39	2.241	0.045	0.031	0.001	0.62876	164.338			5.835	4.789	0.065	0.06	0.003	0.904075	123.225			24.044	2.938	0.247	0.192	0.037	0.772179	13.107
23.45	2.242	0.038	0.033	0.0009653	0.851148	154.819			5.048	4.833	0.146	0.135	0.015	0.895975	2.147			20.523	3.006	0.31	0.279	0.068	0.90094	169.989
7.796	2.259	0.054	0.044	0.002	0.873278	23.648			6.733	4.791	0.063	0.053	0.003	0.962388	159.574			1.306	2.903	0.053	0.046	0.002	0.906543	109.726
5.482	2.266	0.025	0.024	0.0004628	0.942808	15.715			17.789	4.879	0.153	0.122	0.015	0.815865	112.575			17.052	2.939	0.103	0.096	0.008	0.96012	35.459
6.436	2.419	0.404	0.311	0.099	0.772294	171.573			8.139	4.836	0.072	0.05	0.003	0.736828	11.077			5.143	2.944	0.091	0.071	0.005	0.768772	126.419
22.403	2.3	0.077	0.073	0.004	0.858991	40.682			15.52	4.915	0.2	0.18	0.028	0.891268	70.951			6.249	2.92	0.045	0.036	0.001	0.62876	37.35
5.441	2.285	0.029	0.029	0.0006744	1.02101	45.018			14.985	4.973	0.136	0.115	0.012	0.826064	173.648			1.769	2.951	0.072	0.064	0.004	0.982438	154.274
13.192	2.31	0.051	0.044	0.002	0.979038	165.448			13.738	5.049	0.242	0.226	0.043	0.934863	97.417			3.176	2.958	0.086	0.075	0.005	0.860762	8.914
22.622	2.3	0.029	0.026	0.0005818	0.880821	0			9.159	5.082	0.246	0.231	0.045	0.946787	120.703			6.094	4.152	3.095	2.394	5.82	0.773592	178.915
5.272	2.369	0.167	0.15	0.02	0.913077	15.327			16.163	5.156	0.315	0.115	0.028	0.359292	93.44			8.788	3.046	0.056	0.051	0.002	0.812015	57.225
2.71	2.392	0.208	0.183	0.03	0.882886	10.153			19.398	5.042	0.044	0.041	0.001	0.657665	150.632			10.562	3.038	0.054	0.043	0.002	0.873278	5.862
5.571	2.316	0.03	0.028	0.0006612	0.935407	135			12.985	5.177	0.238	0.194	0.036	0.809205	56.705			19.225	3.075	0.103	0.094	0.008	0.96012	18.154
3.549	2.341	0.075	0.065	0.004	0.905415	171.604			4.769	5.093	0.054	0.042	0.002	0.873278	12.783			10.131	3.125	0.153	0.139	0.017	0.924647	30.212
3.451	2.347	0.061	0.06	0.003	1.02653	175.383			4.322	5.109	0.056	0.039	0.002	0.812015	0			8.995	3.172	0.111	0.099	0.009	0.930051	157.39
14.776	2.411	0.211	0.188	0.031	0.886557	177.631			5.332	5.166	0.201	0.153	0.024	0.756361	164.886			8.254	3.16	0.067	0.058	0.003	0.850906	163.001
5.734	2.356	0.061	0.053	0.003	1.02653	14.044			5.033	5.165	0.058	0.054	0.002	0.75698	7.611			4.933	3.187	0.05	0.046	0.002	1.01859	116.683
5.814	2.353	0.049	0.041	0.002	1.06059	180			3.917	5.202	0.097	0.09	0.007	0.94725	157.161			19.451	3.314	0.313	0.294	0.072	0.935737	37.858
4.414	2.437	0.214	0.202	0.034	0.945282	162.794			5.615	5.269	0.19	0.175	0.026	0.917015	153.211			8.464	3.308	0.116	0.102	0.009	0.851602	148.704
5.503	2.356	0.029	0.028	0.0006347	0.96091	90			5.922	5.218	0.091	0.067	0.005	0.768772	143.888			23.768	3.281	0.07	0.056	0.003	0.779534	133.387
22.455	2.366	0.048	0.044	0.002	1.10524	90			19.365	5.211	0.051	0.043	0.002	0.979038	16.905			21.778	3.371	0.232	0.211	0.039	0.922569	178.841
1.783	2.401	0.115	0.108	0.01	0.962752	101.19			4.572	5.257	0.093	0.089	0.007	1.03049	149.884			24.241	3.299	0.079	0.068	0.004	0.816048	19.276
3.688	2.367	0.03	0.028	0.0006612	0.935407	135			19.519	5.276	0.104	0.099	0.008	0.941745	87.029			16.236	3.574	0.575	0.56	0.253	0.974305	97.292
5.135	2.378	0.035	0.035	0.0009521	0.989593	0			6.608	5.308	0.148	0.132	0.015	0.871923	13.504			7.941	3.391	0.202	0.173	0.027	0.842502	168.978
4.983	2.39	0.049	0.044	0.002	1.06059	5.926			18.714	5.321	0.062	0.056	0.003	0.993683	29.697			10.367	3.338	0.094	0.079	0.006	0.864581	175.121
7.342	2.408	0.094	0.084	0.006	0.864581	23.369			21.051	5.479	0.393	0.31	0.096	0.7914	84.789			14.25	3.332	0.06	0.045	0.002	0.707355	124.188
18.045	2.394	0.055	0.052	0.002	0.841811	160.575			4.064	5.397	0.097	0.091	0.007	0.94725	68.189			9.532	3.332	0.045	0.034	0.001	0.62876	48.945
9.391	2.388	0.033	0.031	0.0008198	0.958496	140.169			22.435	5.413	0.116	0.104	0.01	0.946224	141.874			11.565	3.382	0.122	0.119	0.011	0.940986	54.265
7.8	2.398	0.048	0.041	0.002	1.10524	40.994			18.662	5.39	0.057	0.048	0.002	0.783773	168.497			20.28	3.358	0.056	0.048	0.002	0.812015	17.858
5.575	2.391	0.028	0.026	0.0005686	0.923423	30.054			5.989	5.497	0.21	0.197	0.033	0.952764	155.143			24.108	3.372	0.062	0.047	0.002	0.662456	45.741
4.906	2.415	0.051	0.044	0.002	0.979038	72.77			18.596	5.431	0.05	0.044	0.002	1.01859	81.992			3.709	3.398	0.108	0.083	0.007	0.764118	51.482
16.997	2.418	0.039	0.036	0.001	0.837107	72.09			18.769	5.443	0.101	0.076	0.006	0.748891	1.285			17.105	3.429	0.127	0.118	0.012	0.947292	154.291
6.74	2.431	0.028	0.027	0.0006083	0.987897	0			19.34	5.442	0.065	0.049	0.003	0.904075	75.762			11.286	3.407	0.058	0.04	0.002	0.75698	165.922
3.736	2.447	0.048	0.04	0.002	1.10524	46.817			12.054	5.514	0.194	0.179	0.027	0.91342	53.848			9.677	3.709	0.627	0.584	0.288	0.932755	3.805
13.073	2.469	0.09	0.086	0.006	0.94314	28.446			3.65	5.467	0.082	0.076	0.005	0.946787	2.136			12.526	3.562	0.174	0.16	0.022	0.925197	1.015
21.102	2.599	0.378	0.304	0.09	0.80199	36.53			19.57	5.515	0.153	0.13	0.016	0.870256	111.686			8.464	3.525	0.077	0.067	0.004	0.858991	143.611
2.265	2.497	0.132	0.12	0.012	0.876887	179.843			11.278	5.509	0.131	0.123	0.013	0.964519	20.846			19.209	3.583	0.204	0.179	0.029	0.887254	18.746
9.205	2.566	0.285	0.256	0.057	0.893501	3.768			12.684	5.658	0.42	0.356	0.118	0.851714	41.928			22.563	3.766	0.526	0.478	0.198	0.911179	66.941
3.134	2.457	0.03	0.029	0.0006744	0.954081	151.448			11.042	5.745	0.497	0.369	0.144	0.742266	138.231			21.166	3.59	0.165	0.149	0.019	0.888579	58.054
2.47	2.466	0.038	0.031	0.0009388	0.827782	61.641			16.389	5.636	0.175	0.158	0.022	0.914654	90.585			17.924	3.643	0.281	0.258	0.057	0.91912	13.419
17.964	2.473	0.054	0.05	0.002	0.873278	45.011			21.508	5.609	0.139	0.114	0.012	0.790791	99.097			23.117	3.584	0.112	0.088	0.008	0.812015	139.052
23.215	2.668	0.432	0.403	0.137	0.934681	92.035			18.24	5.704	0.317	0.183	0.046	0.58284	11.494			8.59	3.564	0.063	0.054	0.003	0.962388	30.742
1.62	2.514	0.09	0.084	0.006	0.94314	78.339			3.593	5.637	0.052	0.05	0.002	0.941745	56.644			3.554	3.888	0.693	0.671	0.366	0.970342	176.002
2.582	2.484	0.04	0.032	0.001	0.795775	0			5.541	5.763	0.133	0.118	0.012	0.86375	84.332			21.83	3.569	0.054	0.042	0.002	0.873278	38.313
16.555	2.525	0.03	0.027	0.0006347	0.897917	90			3.484	5.737	0.059	0.05	0.002	0.731537	15.247			22.031	3.603	0.126	0.111	0.011	0.882189	174.632
2.47	2.541	0.045	0.041	0.001	0.62876	138.048			3.824	5.824	0.25	0.236	0.046	0.937104	19.933			10.699	3.586	0.059	0.049	0.002	0.731537	55.38
11.341	2.579	0.126	0.114	0.011	0.882189	36.996			22.634	5.765	0.129	0.084	0.009	0.68861	166.13			20.709	3.743	0.28	0.255	0.056	0.909457	132.96
14.164	2.535	0.032	0.03	0.0007537	0.937149	176.781			19.348	5.769	0.084	0.055	0.004	0.721791	146.101			21.492	3.721	0.24	0.214	0.04	0.884194	177.763
21.734	2.542	0.062	0.047	0.002	0.662456	7.118			21.447	6.003	0.579	0.413	0.188	0.714021	42.63			13.727	3.686	0.116	0.099	0.009	0.851602	102.422
2.841	2.545	0.048	0.039	0.001	0.552621	165.902			13.177	5.851	0.19	0.177	0.026	0.917015	55.401			12.807	3.724	0.179	0.174	0.024	0.953708	71.72
7.333	2.54	0.028	0.026	0.0005686	0.923423	45.002			22.783	5.808	0.071	0.07	0.004	1.01031	42.176			11.453	3.697	0.115	0.085	0.008	0.770202	26.151
14.932	2.55	0.053	0.044	0.002	0.906543	20.102			20.766	5.826	0.065	0.064	0.003	0.904075	149.696			7.642	3.68	0.032	0.024	0.0006154	0.765187	79.545
13.096	2.587	0.128	0.104	0.011	0.854836	161.399			22.764	5.986	0.163	0.134	0.017	0.814674	86.6			21.128	3.738	0.061	0.058	0.003	1.02653	178.763
22.04	2.561	0.06	0.052	0.002	0.707355	2.836			6.318	5.966	0.159	0.145	0.018	0.906543	173.504			23.527	3.83	0.19	0.171	0.026	0.917015	159.512
4.761	2.758	0.483	0.438	0.166	0.905991	2.35			19.226	6.745	1.404	1.151	1.27	0.820313	31.638			19.529	3.841	0.186	0.164	0.024	0.883274	164.066
23.57	2.558	0.03	0.029	0.0006876	0.972755	6.528			7.812	6.127	0.377	0.342	0.101	0.904792	100.516			24.046	3.842	0.17	0.142	0.019	0.837078	153.14
2.273	2.608	0.078	0.075	0.005	1.04638	134.958			3.49	5.998	0.095	0.085	0.006	0.846475	157.867			9.077	3.807	0.065	0.051	0.003	0.904075	27.465
3.614	2.587	0.042	0.033	0.001	0.721791	162.421			22.173	6.016	0.132	0.106	0.011	0.803813	111.254			14.203	3.942	0.165	0.141	0.018	0.841811	177.773
6.06	2.608	0.069	0.06	0.003	0.802293	158.172			20.681	6.025	0.152	0.126	0.015	0.826636	167.388			10.302	3.953	0.151	0.14	0.017	0.949304	161.362
13.865	2.633	0.114	0.101	0.009	0.881745	63.11			20.933	6.226	0.497	0.382	0.149	0.76804	117.068			10.699	3.916	0.062	0.056	0.003	0.993683	70.636
6.756	2.608	0.052	0.047	0.002	0.941745	6.741			20.453	6.181	0.415	0.356	0.116	0.857575	44.088			18.964	4.091	0.452	0.371	0.132	0.822635	30.474
1.195	2.666	0.161	0.148	0.019	0.93328	11.189			15.375	6.126	0.292	0.227	0.052	0.776511	155.027			19.826	4.031	0.296	0.252	0.059	0.857391	20.983
2.848	2.612	0.039	0.034	0.001	0.837107	158.732			4.124	6.039	0.067	0.059	0.003	0.850906	168.588			15.484	3.938	0.081	0.074	0.005	0.970309	3.325
7.833	2.613	0.032	0.03	0.0007537	0.937149	74.427			13.615	6.109	0.172	0.162	0.022	0.946838	38.196			10.743	3.991	0.069	0.055	0.003	0.802293	45.109
20.485	2.624	0.034	0.032	0.0008727	0.961208	78.233			2.795	6.141	0.233	0.214	0.039	0.914667	127.124			23.375	4.128	0.281	0.239	0.053	0.854621	167.387
20.553	2.632	0.054	0.05	0.002	0.873278	135			21.722	6.147	0.134	0.108	0.011	0.779997	168.54			20.823	4.322	0.646	0.587	0.298	0.909204	0.121
6.853	2.682	0.163	0.106	0.014	0.670908	39.801			10.237	6.173	0.123	0.106	0.01	0.841589	164.289			23.629	4.063	0.059	0.047	0.002	0.731537	6.011
13.251	2.664	0.082	0.071	0.005	0.946787	18.913			12.732	6.176	0.104	0.088	0.007	0.824027	163.58			23.874	4.074	0.094	0.075	0.006	0.864581	155.736
13.658	2.709	0.146	0.134	0.015	0.895975	27.747			15.077	6.299	0.317	0.276	0.069	0.87426	153.276			15.672	4.071	0.061	0.047	0.002	0.684353	26.73
21.755	2.694	0.062	0.058	0.003	0.993683	50.755			23.253	6.391	0.494	0.174	0.068	0.354785	40.832			18.597	4.094	0.09	0.081	0.006	0.94314	121.965
9.315	2.684	0.029	0.026	0.0005818	0.880821	90			3.269	6.264	0.111	0.093	0.008	0.826712	20.354			11.063	4.152	0.164	0.133	0.017	0.804769	41.213
2.44	2.716	0.08	0.075	0.005	0.994718	134.971			16.114	6.346	0.359	0.257	0.072	0.711301	2.269			19.632	4.11	0.057	0.04	0.002	0.783773	30.338
2.951	2.741	0.084	0.077	0.005	0.902239	30.017			15.619	6.367	0.38	0.251	0.075	0.661309	7.958			8.816	4.32	0.464	0.411	0.15	0.887085	10.088
2.799	2.731	0.029	0.027	0.0006215	0.940926	96.71			22.024	6.379	0.282	0.222	0.049	0.784527	67.586			15.158	4.193	0.197	0.148	0.023	0.75458	142.748
14.196	2.823	0.246	0.21	0.041	0.862628	22.532			21.607	6.45	0.403	0.337	0.107	0.838849	172.251			20.366	4.142	0.072	0.055	0.003	0.736828	67.605
2.195	2.749	0.057	0.048	0.002	0.783773	14.743			19.844	6.451	0.229	0.21	0.038	0.92262	105.747			9.433	4.151	0.064	0.061	0.003	0.932548	57.667
5.422	2.745	0.044	0.044	0.002	1.31533	0			6.919	7.301	2.237	1.79	3.146	0.800455	144.995			10.606	4.321	0.496	0.367	0.143	0.740087	24.226
4.348	2.746	0.039	0.031	0.0009388	0.785876	165.368			23.511	6.41	0.141	0.073	0.008	0.512344	43.359			22.609	4.233	0.2	0.179	0.028	0.891268	53.329
22.607	2.755	0.03	0.027	0.0006347	0.897917	1.016e-13			20.134	6.417	0.134	0.101	0.011	0.779997	58.667			20.267	4.173	0.074	0.066	0.004	0.930051	104.587
15.963	2.781	0.065	0.065	0.003	0.904075	60.495			4.15	6.402	0.06	0.043	0.002	0.707355	31.053			15.669	4.397	0.55	0.484	0.209	0.879693	20.047
16.057	2.779	0.067	0.053	0.003	0.850906	97.096			4.9	6.445	0.083	0.062	0.004	0.739288	43.201			23.868	4.233	0.156	0.15	0.018	0.941745	110.514
11.65	2.776	0.045	0.037	0.001	0.62876	73.413			20.536	6.455	0.081	0.075	0.005	0.970309	53.899			19.739	4.229	0.125	0.118	0.012	0.977848	59.858
15.096	2.783	0.064	0.053	0.003	0.932548	45.005			3.971	6.461	0.068	0.043	0.002	0.550709	25.458			14.427	4.369	0.414	0.342	0.111	0.824579	145.257
1.21	2.812	0.109	0.094	0.008	0.857328	135.81			2.866	6.48	0.089	0.083	0.006	0.964454	122.058			10.374	4.203	0.052	0.042	0.002	0.941745	0
3.734	2.773	0.028	0.026	0.0005686	0.923423	8.48			2.074	6.577	0.093	0.082	0.006	0.883274	58.388			22.843	4.238	0.089	0.046	0.003	0.482227	81.948
5.209	2.779	0.035	0.029	0.0007934	0.824643	163.03			15.227	6.77	0.652	0.431	0.221	0.661923	2.785			2.064	4.261	0.136	0.106	0.011	0.757225	179.641
2.851	2.803	0.071	0.061	0.003	0.75773	20.112			15.875	6.618	0.182	0.151	0.022	0.845649	176.684			10.071	4.267	0.06	0.046	0.002	0.707355	142.711
16.147	2.799	0.027	0.026	0.0005554	0.970037	90			20.511	6.615	0.146	0.119	0.014	0.836243	13.873			2.197	4.303	0.115	0.095	0.009	0.866477	6.285
2	2.855	0.158	0.131	0.016	0.816048	151.377			22.158	6.711	0.342	0.129	0.035	0.381001	102.682			11.768	4.284	0.042	0.032	0.001	0.721791	19.504
6.741	2.808	0.039	0.034	0.001	0.837107	45.003			3.621	6.6	0.093	0.074	0.005	0.736062	5.888			4.395	4.311	0.046	0.033	0.001	0.60172	119.104
15.773	2.822	0.069	0.069	0.004	1.06972	90			21.058	6.863	0.748	0.497	0.292	0.664492	6.189			10.161	4.323	0.063	0.052	0.003	0.962388	24.366
5.472	2.817	0.041	0.032	0.001	0.75743	150.128			16.43	6.616	0.085	0.075	0.005	0.881135	0.061			9.898	4.439	0.262	0.25	0.052	0.964519	5.275
10.566	3.056	0.568	0.493	0.22	0.868233	24.998			21.962	6.642	0.122	0.119	0.011	0.940986	59.604			10.101	4.354	0.05	0.047	0.002	1.01859	88.742
2.772	2.829	0.029	0.028	0.0006347	0.96091	90			16.174	6.67	0.164	0.15	0.019	0.899448	5.976			19.815	4.417	0.207	0.142	0.023	0.683435	11.842
4.437	2.832	0.029	0.028	0.0006347	0.96091	135			22.649	6.838	0.549	0.251	0.108	0.456236	150.662			3.93	4.606	0.525	0.472	0.194	0.896176	5.91
18.031	2.876	0.125	0.117	0.011	0.896361	145.087			3.733	6.715	0.076	0.067	0.004	0.881745	143.951			19.638	4.42	0.096	0.086	0.006	0.828932	15.045
20.607	2.864	0.047	0.043	0.002	1.15277	142.257			20.405	6.725	0.093	0.071	0.005	0.736062	112.46			23.367	4.431	0.041	0.035	0.001	0.75743	60.513
21.056	2.855	0.03	0.029	0.0006744	0.954081	118.552			13.515	8.05	3.71	1.982	5.776	0.534305	15.237			3.048	4.553	0.284	0.265	0.059	0.931377	152.263
13.825	2.965	0.248	0.23	0.045	0.931578	170.29			21.463	6.737	0.088	0.066	0.005	0.822081	164.482			10.983	4.458	0.111	0.082	0.007	0.723373	16.932
17.022	2.862	0.03	0.03	0.0006876	0.972755	0			23.009	6.796	0.183	0.091	0.013	0.494255	106.607			21.913	4.536	0.24	0.19	0.036	0.795775	60.753
3.019	2.881	0.039	0.033	0.001	0.837107	147.629			20.293	6.761	0.092	0.08	0.006	0.90258	101.686			16.683	4.456	0.065	0.057	0.003	0.904075	124.54
11.81	2.929	0.13	0.123	0.013	0.979415	96.612			3.929	6.793	0.077	0.067	0.004	0.858991	59.044			17.495	4.477	0.091	0.085	0.006	0.922526	39.459
23.489	2.891	0.06	0.054	0.003	1.06103	47.68			20.468	6.908	0.282	0.169	0.037	0.592398	151.772			12.255	4.489	0.069	0.061	0.003	0.802293	173.496
3.804	2.929	0.127	0.126	0.013	1.02623	67.008			20.1	6.836	0.056	0.043	0.002	0.812015	26.164			4.329	4.502	0.038	0.027	0.0007953	0.701252	67.777
16.172	2.882	0.027	0.026	0.0005554	0.970037	0			14.79	6.866	0.085	0.079	0.005	0.881135	112.916			24.238	4.551	0.156	0.138	0.017	0.889426	16.804
5.215	2.895	0.035	0.035	0.0009521	0.989593	0			5.767	6.869	0.095	0.077	0.006	0.846475	162.895			15.994	4.566	0.074	0.072	0.004	0.930051	134.764
20.425	2.899	0.033	0.03	0.0007934	0.927629	158.926			23.577	6.978	0.333	0.255	0.066	0.757819	54.116			11.711	4.727	0.405	0.358	0.114	0.884922	17.266
2.159	2.935	0.097	0.088	0.007	0.94725	156.045			7.777	6.866	0.067	0.058	0.003	0.850906	46.291			12.176	4.585	0.055	0.05	0.002	0.841811	32.237
16.109	2.975	0.145	0.129	0.015	0.908375	178.536			10.582	6.877	0.055	0.049	0.002	0.841811	75.566			19.089	4.638	0.143	0.128	0.014	0.871698	20.469
4.382	2.932	0.029	0.028	0.0006479	0.980894	23.112			23.248	6.888	0.08	0.059	0.004	0.795775	36.106			22.803	4.924	0.701	0.61	0.336	0.870589	26.948
9.391	2.928	0.027	0.026	0.0005554	0.970037	147.822			20.202	6.897	0.056	0.052	0.002	0.812015	26.911			19.78	4.668	0.094	0.082	0.006	0.864581	36.18
14.548	2.957	0.074	0.072	0.004	0.930051	42.057			5.592	6.972	0.211	0.181	0.03	0.857959	145.319			16.524	4.675	0.096	0.082	0.006	0.828932	6.447
18.971	2.967	0.097	0.087	0.007	0.94725	114.158			21.837	7.06	0.343	0.28	0.076	0.822499	41.726			8.996	4.751	0.149	0.134	0.016	0.917609	69.43
3.618	2.944	0.029	0.026	0.000595	0.900806	167.793			3.204	6.976	0.199	0.154	0.024	0.771641	168.389			9.298	4.742	0.078	0.063	0.004	0.837107	99.388
4.961	2.965	0.061	0.046	0.002	0.684353	59.24			16.966	6.938	0.062	0.059	0.003	0.993683	65.886			20.408	4.794	0.117	0.109	0.01	0.930119	144.521
9.431	2.951	0.03	0.03	0.0007008	0.991429	45.047			20.12	6.955	0.122	0.083	0.008	0.684353	173.097			8.454	4.854	0.202	0.151	0.024	0.748891	49.119
2.901	2.985	0.03	0.028	0.0006612	0.935407	90			10.624	6.961	0.089	0.07	0.005	0.803711	10.03			12.823	4.83	0.128	0.092	0.009	0.699411	93.959
1.09	3.008	0.061	0.057	0.003	1.02653	47.831			17.438	7.072	0.271	0.233	0.05	0.866845	12.17			3.047	4.818	0.069	0.061	0.003	0.802293	101.004
1.965	2.995	0.036	0.031	0.0008727	0.857374	140.379			15.348	7.045	0.167	0.13	0.017	0.776115	6.225			10.633	4.865	0.149	0.114	0.013	0.745557	51.856
2.329	3.057	0.161	0.14	0.018	0.88416	162.586			15.615	7.069	0.2	0.168	0.026	0.827606	151.662			2.657	4.851	0.061	0.049	0.002	0.684353	44.205
9.762	3.062	0.165	0.16	0.021	0.982113	6.992			8.532	7.028	0.086	0.07	0.005	0.860762	120.848			21.764	4.891	0.114	0.107	0.01	0.979716	11.333
10.907	3.002	0.025	0.023	0.0004496	0.915918	109.127			16.456	7.736	1.767	1.258	1.746	0.712002	12.975			12.311	4.873	0.057	0.033	0.001	0.391887	54.412
3.211	3.015	0.045	0.041	0.001	0.62876	35.779			20.941	7.099	0.056	0.048	0.002	0.812015	115.794			3.313	4.945	0.147	0.135	0.016	0.942748	98.873
21.861	3.016	0.054	0.047	0.002	0.873278	24.485			3.614	7.147	0.14	0.128	0.014	0.909457	13.384			19.821	4.933	0.174	0.136	0.019	0.799034	11.259
9.19	3.081	0.178	0.153	0.021	0.843897	42.37			8.418	7.206	0.281	0.223	0.049	0.790121	133.456			16.986	4.921	0.08	0.069	0.004	0.795775	83.595
17.183	3.037	0.061	0.058	0.003	1.02653	138.706			2.115	7.168	0.144	0.129	0.015	0.921036	145.591			2.491	4.934	0.09	0.073	0.005	0.78595	0.004
2.983	3.026	0.032	0.03	0.0007537	0.937149	169.629			20.75	7.135	0.073	0.045	0.003	0.71678	107.007			21.101	4.924	0.05	0.038	0.001	0.509296	91.845
3.75	3.025	0.029	0.028	0.0006347	0.96091	135			20.816	7.128	0.052	0.046	0.002	0.941745	0.763			20.266	5.03	0.242	0.219	0.042	0.913122	52.994
4.134	3.027	0.034	0.032	0.0008595	0.946669	110.717			9.754	7.152	0.073	0.062	0.004	0.955706	32.428			2.993	4.947	0.057	0.04	0.002	0.783773	45.061
6.158	3.033	0.029	0.026	0.000595	0.900806	102.207			17.98	7.141	0.062	0.049	0.002	0.662456	4.653			2.249	5	0.156	0.127	0.016	0.837107	4.604
1.357	3.067	0.095	0.088	0.007	0.987554	142.65			20.094	7.382	0.547	0.391	0.168	0.714899	63.12			15.083	4.994	0.108	0.104	0.009	0.982438	162.227
3.113	3.071	0.083	0.068	0.004	0.739288	76.37			23.382	7.165	0.083	0.062	0.004	0.739288	14.103			13.754	4.984	0.069	0.063	0.003	0.802293	73.792
20.435	3.057	0.051	0.044	0.002	0.979038	14.552			20.935	7.336	0.399	0.351	0.11	0.879745	82.725			20.917	5.278	0.65	0.615	0.314	0.946266	10.202
22.164	3.069	0.074	0.065	0.004	0.930051	28.548			18.251	7.215	0.067	0.055	0.003	0.850906	13.947			21.741	5.042	0.148	0.126	0.015	0.871923	77.459
4.738	3.055	0.031	0.03	0.0007273	0.963608	37.146			5.732	7.251	0.127	0.095	0.009	0.710469	160.348			19.012	4.991	0.04	0.03	0.0009467	0.75336	110.328
13.577	3.072	0.067	0.06	0.003	0.850906	167.759			18.462	7.245	0.071	0.062	0.003	0.75773	140.714			20.563	5.042	0.052	0.042	0.002	0.941745	49.126
1.567	3.065	0.029	0.028	0.0006479	0.980894	66.888			17.83	7.273	0.079	0.061	0.004	0.816048	135.488			18.444	5.066	0.048	0.045	0.002	1.10524	40.076
12.541	3.077	0.062	0.05	0.002	0.662456	178.855			21.625	7.323	0.145	0.116	0.013	0.787259	128.803			4.178	5.115	0.128	0.11	0.011	0.854836	28.08
20.215	3.077	0.031	0.031	0.0007405	0.981097	0			9.673	7.298	0.097	0.085	0.007	0.94725	174.535			16.283	5.151	0.206	0.175	0.028	0.840105	3.231
12.484	3.099	0.051	0.044	0.002	0.979038	75.448			22.875	7.305	0.093	0.069	0.005	0.736062	76.291			19.36	5.478	1.027	0.816	0.658	0.794319	5.436
3.982	3.102	0.044	0.044	0.002	1.31533	0			2.432	7.333	0.084	0.078	0.005	0.902239	135.804			18.907	5.102	0.036	0.025	0.0007006	0.688296	65.137
13.444	3.145	0.16	0.101	0.013	0.646567	19.7			21.81	7.342	0.107	0.089	0.007	0.778468	120.287			20.07	5.146	0.113	0.1	0.009	0.89742	39.988
11.182	3.104	0.029	0.026	0.000595	0.900806	12.207			18.734	7.353	0.091	0.084	0.006	0.922526	52.663			1.248	5.21	0.249	0.202	0.04	0.821432	179.968
7.589	3.13	0.075	0.061	0.004	0.905415	96.398			5.399	7.435	0.216	0.197	0.033	0.900568	121.647			4.617	5.138	0.048	0.038	0.001	0.552621	20.759
3.213	3.166	0.131	0.122	0.013	0.964519	134.522			17.824	7.547	0.44	0.386	0.134	0.881271	54.946			2.827	5.165	0.073	0.058	0.003	0.71678	94.96
21.375	3.124	0.029	0.028	0.0006347	0.96091	45.041			22.028	7.552	0.465	0.328	0.12	0.706619	144.175			1.025	5.203	0.151	0.13	0.015	0.837621	12.525
12.57	3.149	0.061	0.059	0.003	1.02653	106.564			3.279	7.427	0.139	0.116	0.013	0.85669	161.927			1.569	5.273	0.101	0.091	0.007	0.873706	32.783
1.196	3.149	0.041	0.033	0.001	0.75743	45.294			5.768	7.461	0.125	0.095	0.009	0.733386	114.253			7.958	5.297	0.165	0.151	0.019	0.888579	76.413
4.689	3.16	0.031	0.031	0.0007405	0.981097	0			22.765	7.491	0.13	0.103	0.011	0.828736	65.213			21.414	5.283	0.097	0.084	0.006	0.811929	55.587
6.669	3.168	0.031	0.028	0.0006876	0.911009	27.409			18.54	7.465	0.072	0.061	0.003	0.736828	168.862			16.421	5.274	0.06	0.05	0.002	0.707355	136.692
1.968	3.181	0.045	0.041	0.001	0.62876	134.994			23.632	7.504	0.117	0.073	0.007	0.651083	45.139			14.072	5.284	0.05	0.046	0.002	1.01859	91.92
8.469	3.189	0.063	0.057	0.003	0.962388	45.009			19.597	7.551	0.136	0.103	0.011	0.757225	147.649			14.882	5.819	1.345	1.096	1.158	0.815031	159.291
9.995	3.19	0.06	0.058	0.003	1.06103	137.413			10.639	7.686	0.352	0.304	0.084	0.863185	50.102			21.623	5.387	0.18	0.147	0.021	0.825248	140.51
20.908	3.183	0.045	0.037	0.001	0.62876	74.244			21.25	7.606	0.14	0.102	0.011	0.714573	92.651			3.73	5.551	0.711	0.483	0.27	0.68004	166.333
11.661	3.252	0.18	0.159	0.023	0.903843	136.122			11.48	7.682	0.258	0.237	0.048	0.918146	134.923			1.839	5.342	0.082	0.045	0.003	0.568072	179.43
13.703	3.218	0.11	0.093	0.008	0.841811	54.374			8.518	7.658	0.235	0.169	0.031	0.71472	3.124			20.184	5.422	0.259	0.193	0.039	0.740245	13.588
20.605	3.182	0.029	0.026	0.0005818	0.880821	90			18.063	7.788	0.356	0.272	0.076	0.763526	36.689			14.182	5.384	0.102	0.098	0.008	0.979038	67.163
21.752	3.183	0.031	0.028	0.0006876	0.911009	27.409			18.366	7.664	0.046	0.044	0.002	1.20344	146.31			7.635	5.598	0.607	0.414	0.197	0.680768	149.982
1.324	3.203	0.067	0.06	0.003	0.850906	6.561			18.937	7.706	0.126	0.109	0.011	0.882189	62.222			4.123	5.413	0.057	0.05	0.002	0.783773	72.977
5.566	3.198	0.041	0.033	0.001	0.75743	15.617			5.235	8.253	1.615	1.114	1.413	0.689775	167.997			8.329	5.42	0.078	0.05	0.003	0.62783	27.406
7.199	3.234	0.136	0.057	0.006	0.413032	135.816			11.143	7.755	0.136	0.11	0.012	0.826064	137.853			21.874	5.459	0.093	0.077	0.006	0.883274	50.413
6.12	3.205	0.029	0.026	0.0005818	0.880821	0			22.93	7.915	0.511	0.307	0.123	0.599754	45.709			22.24	5.471	0.074	0.056	0.003	0.697538	76.943
13.065	3.208	0.031	0.029	0.000714	0.945987	45			22.567	7.76	0.216	0.105	0.018	0.491219	12.142			21.83	5.533	0.052	0.048	0.002	0.941745	161.093
4.796	3.218	0.044	0.044	0.002	1.31533	0			19.663	7.767	0.125	0.097	0.009	0.733386	126.401			9.879	6.75	2.372	1.847	3.441	0.778691	111.838
9.871	3.224	0.028	0.028	0.000595	0.966298	0			9.082	7.889	0.299	0.282	0.066	0.939965	90.364			15.679	5.649	0.207	0.181	0.029	0.861722	153.316
0.849	3.241	0.053	0.044	0.002	0.906543	108.969			2.267	8.706	2.681	1.802	3.795	0.672246	165.523			6.962	5.74	0.343	0.243	0.066	0.714276	138.56
2.04	3.264	0.085	0.071	0.005	0.881135	125.368			5.741	7.837	0.079	0.069	0.004	0.816048	153.526			18.386	5.621	0.052	0.043	0.002	0.941745	4.044
23.002	3.299	0.138	0.128	0.014	0.936009	127.642			15.313	7.831	0.087	0.062	0.004	0.672871	172.638			4.875	5.667	0.113	0.094	0.008	0.797707	47.1
4.385	3.266	0.054	0.05	0.002	0.873278	135			3.929	7.865	0.092	0.08	0.006	0.90258	174.595			22.348	6.148	1.276	1.076	1.079	0.843782	177.361
22.381	3.324	0.172	0.156	0.021	0.9038	122.744			18.474	8.859	1.886	1.103	1.633	0.584538	54.073			9.153	5.663	0.087	0.073	0.005	0.841088	147.862
4.843	3.298	0.111	0.104	0.009	0.930051	159.669			24.006	7.929	0.232	0.16	0.029	0.686013	175.434			8.564	5.707	0.122	0.114	0.011	0.940986	157.079
3.488	3.301	0.097	0.089	0.007	0.94725	103.139			17.59	8.082	0.497	0.385	0.15	0.773194	43.818			20.526	5.737	0.195	0.178	0.027	0.904075	170.276
20.428	3.28	0.038	0.031	0.0009124	0.804504	169.022			19.712	7.916	0.121	0.079	0.008	0.695712	6.759			5.043	5.684	0.044	0.041	0.001	0.657665	135.744
0.868	3.292	0.038	0.031	0.0009388	0.827782	138.96			11.214	7.913	0.069	0.058	0.003	0.802293	157.68			16.767	5.804	0.32	0.272	0.068	0.845511	34.036
12.487	3.291	0.03	0.03	0.0006876	0.972755	0			15.415	7.923	0.054	0.052	0.002	0.873278	10.6			18.036	5.759	0.204	0.186	0.03	0.917849	25.478
14.142	3.298	0.032	0.031	0.0007802	0.970099	35.538			9.36	7.935	0.053	0.046	0.002	0.906543	43.13			20.324	5.697	0.054	0.04	0.002	0.873278	41.072
15.852	3.352	0.148	0.14	0.016	0.930051	172.63			4.271	7.941	0.058	0.056	0.003	1.13547	17.149			8.118	5.779	0.219	0.166	0.028	0.743327	179.908
14.475	3.315	0.026	0.026	0.0005421	1.02104	0			23.582	8.702	1.697	1.305	1.74	0.7693	133.473			4.088	5.742	0.059	0.051	0.002	0.731537	19.775
16.48	3.324	0.035	0.035	0.0009521	0.989593	0			9.515	7.969	0.059	0.049	0.002	0.731537	8.067			4.633	5.781	0.106	0.097	0.008	0.906543	69.886
17.378	3.327	0.044	0.044	0.002	1.31533	0			10.353	7.983	0.078	0.062	0.004	0.837107	44.204			1.852	5.869	0.269	0.228	0.048	0.844592	129.926
20.706	3.339	0.071	0.068	0.004	1.01031	45.03			11.329	7.984	0.046	0.042	0.002	1.20344	138.119			4.992	5.775	0.06	0.052	0.002	0.707355	6.292
21.517	3.331	0.03	0.029	0.0006744	0.954081	66.801			22.446	8.078	0.228	0.181	0.032	0.783773	43.045			17.352	5.85	0.125	0.117	0.011	0.896361	151.931
3.277	3.356	0.075	0.075	0.004	0.905415	95.906			22.616	8.032	0.096	0.07	0.005	0.690777	70.637			13.79	5.825	0.073	0.058	0.003	0.71678	178.169
4.752	3.352	0.06	0.053	0.002	0.707355	6.173			4.072	8.119	0.262	0.188	0.039	0.723389	12.851			17.597	5.951	0.297	0.246	0.057	0.822758	50.502
8.852	3.358	0.061	0.048	0.002	0.684353	56.931			19.486	8.195	0.229	0.192	0.035	0.849781	105.728			20.324	5.825	0.047	0.042	0.002	1.15277	172.66
9.97	3.358	0.061	0.054	0.003	1.02653	88.664			10.624	8.19	0.066	0.057	0.003	0.876887	168.905			18.68	5.858	0.113	0.095	0.008	0.797707	46.789
11.404	3.355	0.059	0.053	0.002	0.731537	92.625			22.586	8.279	0.196	0.157	0.024	0.795443	44.327			13.621	5.896	0.153	0.143	0.017	0.924647	8.459
19.829	3.356	0.044	0.044	0.002	1.31533	0			15.66	8.211	0.055	0.051	0.002	0.841811	74.632			15.953	5.902	0.166	0.151	0.02	0.924111	161.378
21.493	3.365	0.025	0.025	0.0004893	0.996794	0			18.002	8.228	0.09	0.086	0.006	0.94314	164.244			5.143	5.855	0.034	0.031	0.0008331	0.917592	155.021
1.383	3.379	0.045	0.037	0.001	0.62876	105.165			18.13	8.24	0.102	0.083	0.007	0.856659	101.221			8.582	6.057	0.579	0.435	0.198	0.752001	3.888
10.343	3.445	0.202	0.174	0.028	0.873706	8.927			11.559	8.229	0.048	0.038	0.001	0.552621	132.814			6.614	5.918	0.167	0.138	0.018	0.821769	13.405
0.932	3.393	0.03	0.029	0.0006876	0.972755	134.989			17.162	8.247	0.095	0.074	0.006	0.846475	14.466			5.257	5.904	0.102	0.101	0.008	0.979038	62.482
1.263	3.408	0.061	0.057	0.003	1.02653	134.983			8.974	8.47	0.574	0.53	0.239	0.923601	3.869			5.027	5.874	0.037	0.032	0.0009278	0.862901	114.98
12.481	3.46	0.163	0.156	0.02	0.95844	109.541			0.848	8.303	0.185	0.154	0.022	0.818445	10.641			13.863	5.886	0.057	0.042	0.002	0.783773	61.323
17.471	3.407	0.068	0.061	0.003	0.826064	174.043			8.088	8.403	0.373	0.308	0.09	0.823635	156.212			4.181	5.982	0.27	0.222	0.047	0.820881	172.393
14.245	3.433	0.095	0.088	0.007	0.987554	88.387			15.695	8.362	0.229	0.185	0.033	0.801222	95.047			16.136	5.935	0.114	0.088	0.008	0.783773	146.149
20.442	3.412	0.053	0.053	0.002	0.906543	45			6.876	8.315	0.11	0.07	0.006	0.631358	113.206			4.659	6.261	0.747	0.608	0.357	0.814586	19.595
22.855	3.407	0.045	0.044	0.002	1.25752	24.444			16.907	8.481	0.438	0.408	0.14	0.929159	65.493			2.865	5.99	0.087	0.078	0.005	0.841088	7.192
9.5	3.404	0.029	0.026	0.0005818	0.880821	90			11.573	8.306	0.043	0.03	0.0009917	0.682894	70.264			7.572	6.551	1.43	1.047	1.176	0.732226	20.424
21.437	3.404	0.029	0.028	0.0006479	0.980894	66.888			18.043	8.344	0.101	0.091	0.007	0.873706	152.588			17.858	6.072	0.169	0.157	0.021	0.936173	148.671
4.45	3.416	0.052	0.046	0.002	0.941745	146.429			7.21	8.327	0.057	0.051	0.002	0.783773	163.083			20.401	6.064	0.149	0.112	0.013	0.745557	13.552
9.563	3.428	0.083	0.075	0.005	0.924111	15.071			10.362	8.355	0.111	0.09	0.008	0.826712	3.052			16.611	6.092	0.168	0.107	0.014	0.631567	155.172
2.03	3.429	0.065	0.059	0.003	0.904075	170.88			15.992	8.497	0.183	0.141	0.02	0.760393	132.915			6.603	6.089	0.11	0.093	0.008	0.841811	8.159
4.011	3.443	0.077	0.074	0.004	0.858991	150.714			6.51	8.495	0.084	0.076	0.005	0.902239	71.888			16.038	6.172	0.29	0.242	0.055	0.832677	151.089
8.056	3.452	0.081	0.072	0.005	0.970309	97.432			7.653	8.5	0.1	0.085	0.007	0.891268	81.204			13.708	6.132	0.166	0.146	0.019	0.877905	8.5
6.344	3.455	0.072	0.066	0.004	0.982438	0			17.711	8.483	0.06	0.049	0.002	0.707355	45.863			10.906	6.182	0.297	0.233	0.054	0.779455	179.033
10.53	3.459	0.075	0.069	0.004	0.905415	84.185			18.2	8.526	0.155	0.128	0.016	0.847943	29.063			23.165	6.148	0.178	0.145	0.02	0.803711	7.041
13.924	3.465	0.09	0.088	0.006	0.94314	123.029			4.363	8.498	0.073	0.053	0.003	0.71678	61.619			18.65	6.607	1.107	1.047	0.911	0.946528	5.328
16.968	3.459	0.067	0.06	0.003	0.850906	167.064			19.486	8.507	0.176	0.071	0.01	0.411041	178.499			13.16	6.127	0.081	0.071	0.005	0.970309	131.166
22.365	3.451	0.031	0.029	0.000714	0.945987	90			11.083	8.545	0.043	0.036	0.001	0.68861	169.439			3.381	6.119	0.047	0.041	0.002	1.15277	44.34
18.441	3.473	0.063	0.059	0.003	0.962388	45.019			15.088	8.623	0.124	0.113	0.011	0.910876	130.91			11.766	6.151	0.067	0.066	0.003	0.850906	176.124
20.512	3.462	0.035	0.031	0.0008595	0.893346	8.902			9.345	8.608	0.075	0.058	0.003	0.679061	160.679			11.331	6.34	0.428	0.307	0.103	0.715912	25.088
13.113	3.492	0.095	0.083	0.006	0.846475	60.942			7.017	9.146	2.361	1.1	2.04	0.46596	5.618			3.777	6.195	0.077	0.065	0.004	0.858991	25.304
22.915	3.479	0.045	0.036	0.001	0.62876	112.771			16.069	9.06	0.976	0.732	0.561	0.749848	18.868			5.86	6.21	0.09	0.084	0.006	0.94314	88.045
9.226	3.63	0.353	0.326	0.09	0.919609	164.777			16.556	8.741	0.162	0.098	0.012	0.582185	53.141			1.604	6.269	0.227	0.154	0.027	0.667148	3.286
10.096	3.563	0.224	0.188	0.033	0.83739	12.307			14.761	8.757	0.227	0.156	0.028	0.691857	12.352			14.201	6.248	0.114	0.082	0.007	0.685802	66.879
1.629	3.489	0.035	0.031	0.0008463	0.879627	19.291			17.436	8.744	0.139	0.071	0.008	0.527194	74.055			13.555	6.286	0.109	0.092	0.008	0.857328	10.553
15.781	3.541	0.144	0.123	0.014	0.859633	2.959			8.756	8.769	0.133	0.119	0.012	0.86375	134.812			15.705	6.299	0.089	0.081	0.006	0.964454	148.036
4.422	3.52	0.067	0.067	0.004	1.13454	0			20.842	8.76	0.116	0.063	0.006	0.567735	7.127			19.999	6.506	0.576	0.45	0.204	0.78288	9.546
4.636	3.502	0.032	0.032	0.0007934	0.986512	0			10.351	8.772	0.079	0.06	0.004	0.816048	150.232			3.776	6.324	0.052	0.043	0.002	0.941745	65.287
14.129	3.517	0.06	0.058	0.003	1.06103	42.587			16.957	8.763	0.064	0.045	0.002	0.621699	26.328			16.19	6.334	0.057	0.051	0.002	0.783773	110.166
4.746	3.548	0.134	0.111	0.012	0.850906	167.992			11.265	9.273	1.296	0.931	0.948	0.718635	31.627			3.08	6.355	0.088	0.081	0.006	0.986498	70.282
5.397	3.524	0.06	0.052	0.002	0.707355	112.828			15.008	8.925	0.335	0.231	0.061	0.692071	85.124			17.557	6.335	0.042	0.026	0.0008521	0.615038	51.437
9.883	3.508	0.029	0.029	0.0006612	1.00103	171.712			10.922	8.799	0.064	0.051	0.003	0.932548	19.953			23.329	6.393	0.159	0.134	0.017	0.856179	139.092
17.6	3.51	0.031	0.03	0.0007273	0.963608	146.644			8.634	8.867	0.133	0.11	0.012	0.86375	133.299			21.095	6.385	0.088	0.071	0.005	0.822081	43.34
5.293	3.543	0.041	0.037	0.001	0.75743	0.29			4.977	9.089	0.752	0.462	0.273	0.614663	6.06			5.732	6.386	0.052	0.043	0.002	0.941745	35.168
13.036	3.59	0.122	0.119	0.011	0.940986	124.727			19.586	8.911	0.123	0.093	0.009	0.75743	174.35			17.255	6.413	0.056	0.048	0.002	0.812015	84.062
4.04	3.614	0.185	0.148	0.021	0.781243	154.323			20.984	8.932	0.132	0.099	0.01	0.730739	24.704			21.345	6.422	0.056	0.046	0.002	0.812015	6.055
6.317	3.556	0.031	0.031	0.0007405	0.981097	90			14.411	9.075	0.442	0.285	0.099	0.64521	21.063			11.947	6.789	0.837	0.714	0.469	0.852378	25.498
1.268	3.601	0.115	0.106	0.01	0.962752	119.348			17.401	8.994	0.116	0.065	0.006	0.567735	130.509			13.397	6.638	0.509	0.426	0.17	0.835456	16.531
6.083	3.56	0.037	0.03	0.000886	0.824025	11.01			21.621	9.076	0.293	0.184	0.042	0.622908	52.932			16.012	6.45	0.058	0.055	0.003	1.13547	12.549
6.739	3.674	0.279	0.258	0.057	0.932345	162.791			15.254	8.999	0.098	0.085	0.007	0.928017	55.524			12.915	6.483	0.145	0.108	0.012	0.7267	9.558
9.766	3.574	0.029	0.026	0.000595	0.900806	77.793			20.292	9.033	0.217	0.088	0.015	0.405585	148.647			21.545	6.615	0.395	0.328	0.102	0.832369	11.139
4.863	3.585	0.041	0.034	0.001	0.75743	50.348			8.582	9.016	0.104	0.086	0.007	0.824027	142.387			3.378	6.757	0.784	0.62	0.381	0.789229	174.934
22.976	3.585	0.029	0.026	0.0005818	0.880821	90			8.423	9.026	0.089	0.086	0.006	0.964454	75.276			15.759	6.477	0.074	0.063	0.004	0.930051	173.009
2.011	3.615	0.07	0.061	0.003	0.779534	71.077			10.523	9.02	0.062	0.054	0.003	0.993683	130.056			4.263	6.506	0.109	0.1	0.008	0.857328	63.792
11.603	3.611	0.03	0.028	0.0006612	0.935407	90			12.155	9.052	0.124	0.122	0.012	0.993683	134.928			3.995	6.529	0.14	0.135	0.015	0.974418	59.65
3.018	3.625	0.052	0.045	0.002	0.941745	0			15.399	9.051	0.067	0.051	0.003	0.850906	35.468			17.834	6.484	0.038	0.034	0.001	0.881745	111.437
5.411	3.633	0.068	0.06	0.003	0.826064	176.769			20.486	9.064	0.079	0.068	0.004	0.816048	92.652			22.986	6.513	0.055	0.042	0.002	0.841811	136.102
12.645	3.745	0.281	0.278	0.061	0.98362	13.952			19.636	9.251	0.416	0.194	0.063	0.463515	57.522			19.364	6.566	0.084	0.06	0.004	0.721791	179.474
1.767	3.683	0.161	0.146	0.018	0.88416	143.372			16.697	9.063	0.053	0.045	0.002	0.906543	21.132			8.499	6.694	0.253	0.182	0.036	0.716097	165.286
4.285	3.63	0.035	0.032	0.0008727	0.907066	45.004			8.724	9.348	0.626	0.552	0.271	0.880503	34.976			12.619	6.726	0.282	0.242	0.054	0.864581	175.33
17.178	3.711	0.216	0.191	0.032	0.873278	4.507			10.077	9.097	0.063	0.06	0.003	0.962388	20.198			14.617	6.654	0.064	0.057	0.003	0.932548	126.24
17.711	3.657	0.08	0.074	0.005	0.994718	74.729			10.432	9.149	0.157	0.149	0.018	0.929787	135.787			2.768	6.684	0.096	0.088	0.007	0.967087	151.402
10.373	3.664	0.076	0.075	0.004	0.881745	24.494			14.776	9.151	0.164	0.116	0.015	0.71009	126.175			19.367	6.668	0.071	0.055	0.003	0.75773	18.992
4.759	3.682	0.13	0.103	0.011	0.828736	175.94			21.204	9.183	0.169	0.096	0.013	0.579536	74.472			11.033	6.745	0.209	0.184	0.03	0.874458	21.878
11.017	3.665	0.069	0.065	0.004	1.06972	130.835			14.975	9.174	0.179	0.14	0.02	0.794756	167.185			6.58	6.766	0.23	0.194	0.035	0.842408	154.234
2.473	3.661	0.04	0.034	0.001	0.795775	110.112			12.263	9.164	0.066	0.049	0.003	0.876887	6.577			14.442	6.819	0.349	0.318	0.087	0.909449	173.687
1.43	3.66	0.029	0.026	0.0005818	0.880821	30.257			24.597	9.27	0.259	0.142	0.029	0.550438	111.604			2.692	6.683	0.041	0.03	0.0009562	0.724254	65.631
16.63	3.708	0.124	0.108	0.011	0.910876	159.002			9.552	9.164	0.05	0.037	0.001	0.509296	20.841			20.8	6.834	0.163	0.133	0.017	0.814674	32.372
21.865	3.678	0.048	0.046	0.002	1.10524	74.161			20.088	9.242	0.261	0.177	0.036	0.672871	161.17			20.118	6.787	0.04	0.037	0.001	0.795775	33.296
2.849	3.682	0.041	0.032	0.001	0.75743	158.249			16.762	9.185	0.05	0.036	0.001	0.509296	52.053			4.167	6.81	0.081	0.071	0.005	0.970309	30.589
2.761	3.686	0.034	0.03	0.0007934	0.873865	94.746			10.29	9.195	0.061	0.05	0.002	0.684353	169.537			4.542	6.824	0.088	0.076	0.005	0.822081	24.093
3.864	3.704	0.082	0.065	0.004	0.75743	16.77			12.898	9.254	0.28	0.129	0.028	0.454728	178.204			15.725	6.9	0.245	0.154	0.03	0.636355	113.434
8.072	3.709	0.07	0.067	0.004	1.03938	138.163			14.587	9.228	0.088	0.078	0.005	0.822081	156.074			6.04	6.832	0.075	0.066	0.004	0.905415	13.216
2.309	3.753	0.162	0.078	0.01	0.485155	144.11			20.299	9.229	0.091	0.068	0.005	0.768772	35.873			20.592	6.881	0.142	0.127	0.014	0.884019	167.004
5.096	3.808	0.235	0.222	0.041	0.945275	28.462			20.502	9.232	0.075	0.039	0.002	0.452707	123.655			13.941	7.135	0.765	0.596	0.358	0.77888	171.422
23.265	3.738	0.068	0.067	0.004	1.10142	157.62			5.772	9.249	0.121	0.072	0.007	0.608748	169.132			4.236	6.889	0.082	0.075	0.005	0.946787	161.855
10.499	3.752	0.066	0.059	0.003	0.876887	98.162			12.187	9.236	0.05	0.039	0.002	1.01859	156.067			19.575	6.905	0.121	0.086	0.008	0.695712	5.195
15.789	3.747	0.034	0.03	0.0008066	0.888404	112.3			5.484	9.369	0.425	0.229	0.076	0.53573	146.35			21.193	6.922	0.122	0.111	0.011	0.940986	23.277
16.739	3.758	0.046	0.043	0.002	1.20344	152.108			15.243	9.294	0.19	0.127	0.019	0.670126	160.851			23.321	6.927	0.11	0.102	0.009	0.947038	110.425
14.574	3.76	0.046	0.032	0.001	0.60172	113.18			8.316	9.307	0.138	0.127	0.014	0.936009	149.492			21.441	6.906	0.064	0.054	0.003	0.932548	40.654
7.45	3.829	0.184	0.158	0.023	0.864973	106.408			12.103	9.261	0.046	0.037	0.001	0.60172	172.891			6.539	6.923	0.085	0.075	0.005	0.881135	98.389
8.823	3.755	0.028	0.026	0.0005686	0.923423	149.946			17.502	9.367	0.236	0.169	0.031	0.708676	115.101			13.201	7.027	0.274	0.213	0.046	0.78013	32.228
8.905	3.758	0.029	0.026	0.0005818	0.880821	0			0.899	9.421	0.345	0.3	0.081	0.866477	27.898			8.733	6.956	0.06	0.045	0.002	0.707355	24.028
2.825	3.906	0.374	0.318	0.093	0.846545	178.439			14.005	9.326	0.162	0.128	0.016	0.776247	13.873			21.999	6.992	0.08	0.075	0.005	0.994718	99.096
3.141	3.77	0.051	0.044	0.002	0.979038	14.552			21.438	9.398	0.328	0.243	0.063	0.745595	28.216			2.935	7.081	0.181	0.158	0.022	0.855019	9.871
2.148	3.798	0.11	0.084	0.007	0.736585	3.522			10.408	9.31	0.093	0.073	0.005	0.736062	170.835			6.455	7.069	0.074	0.062	0.004	0.930051	17.278
9.588	3.771	0.034	0.031	0.0008331	0.917592	6.685			10.055	9.296	0.039	0.027	0.0008081	0.676466	90			14.838	7.072	0.066	0.063	0.003	0.876887	36.375
10.198	3.782	0.051	0.049	0.002	0.979038	43.011			14.515	9.324	0.08	0.07	0.004	0.795775	129.8			4.703	7.101	0.078	0.07	0.004	0.837107	79.385
14.481	3.777	0.025	0.023	0.0004496	0.915918	160.873			12.01	9.348	0.105	0.091	0.007	0.808406	11.209			7.369	7.087	0.041	0.032	0.001	0.75743	86.847
1.974	3.781	0.031	0.03	0.0007273	0.963608	19.187			14.352	9.324	0.062	0.056	0.003	0.993683	167.096			12.635	7.118	0.107	0.089	0.008	0.889677	36.346
3.905	3.78	0.029	0.027	0.0006083	0.920941	0			20.526	9.346	0.106	0.057	0.005	0.566589	114.755			20.835	7.591	1.164	0.949	0.867	0.814748	178.64
4.418	3.822	0.116	0.103	0.009	0.851602	4.41			5.825	9.355	0.096	0.078	0.006	0.828932	42.203			6.294	7.412	0.752	0.632	0.373	0.839814	11.909
8.946	3.803	0.029	0.028	0.0006479	0.980894	156.888			12.638	9.348	0.109	0.042	0.004	0.428664	155.878			17.833	7.141	0.069	0.06	0.003	0.802293	39.908
7.819	3.839	0.108	0.079	0.007	0.764118	40.413			12.494	9.436	0.218	0.185	0.032	0.857328	163.763			16.256	7.166	0.091	0.071	0.005	0.768772	120.552
9.447	3.805	0.024	0.023	0.0004496	0.993834	90			17.35	9.381	0.086	0.069	0.005	0.860762	90.453			7	7.16	0.068	0.066	0.004	1.10142	50.758
12.343	3.824	0.06	0.05	0.002	0.707355	64.547			4.886	9.429	0.28	0.155	0.034	0.55217	18.565			19.778	7.162	0.068	0.062	0.003	0.826064	69.01
8.905	3.809	0.024	0.023	0.0004496	0.993834	90			24.373	9.464	0.283	0.203	0.045	0.715401	3.814			4.996	7.158	0.05	0.048	0.002	1.01859	172.486
9.019	3.825	0.062	0.027	0.001	0.331228	45.684			16.523	9.43	0.123	0.084	0.008	0.673271	57.729			7.655	7.219	0.2	0.166	0.026	0.827606	23.525
2.273	3.819	0.04	0.032	0.001	0.795775	14.404			16.988	9.482	0.22	0.16	0.028	0.736585	23.897			15.534	7.187	0.062	0.049	0.002	0.662456	76.151
8.389	3.822	0.032	0.032	0.0007934	0.986512	0			11.894	9.418	0.06	0.047	0.002	0.707355	32.41			15.445	7.198	0.074	0.058	0.003	0.697538	131.199
22.6	3.835	0.06	0.06	0.003	1.06103	0			20.054	9.495	0.222	0.188	0.033	0.852547	155.464			22.027	7.253	0.228	0.184	0.033	0.808266	4.953
16.084	3.853	0.074	0.073	0.004	0.930051	0			5.237	10.006	1.313	0.995	1.026	0.757754	144.417			15.693	7.29	0.206	0.196	0.032	0.96012	139.365
10.005	3.906	0.18	0.172	0.024	0.94314	8.56			16.663	9.473	0.143	0.087	0.01	0.622641	114.021			8.256	7.211	0.042	0.029	0.0009657	0.697034	27.205
13.166	3.847	0.049	0.043	0.002	1.06059	90			15.209	9.835	1.115	0.82	0.718	0.735334	170.525			8.043	7.244	0.044	0.029	0.001	0.657665	63.196
13.845	3.836	0.043	0.031	0.001	0.68861	170.757			19.7	9.473	0.096	0.089	0.007	0.967087	179.873			7.267	7.264	0.062	0.059	0.003	0.993683	23.937
23.194	3.886	0.14	0.116	0.013	0.844496	19.262			9.601	9.461	0.054	0.047	0.002	0.873278	144.997			15.298	7.288	0.137	0.107	0.012	0.814048	17.786
8.878	3.844	0.025	0.024	0.0004628	0.942808	164.285			13.123	9.46	0.074	0.046	0.003	0.697538	19.119			7.42	7.289	0.035	0.027	0.0007574	0.787226	143.602
8.908	3.847	0.029	0.028	0.0006215	0.940926	51.497			13.214	9.915	2.383	0.862	1.613	0.361657	6.64			15.109	7.341	0.158	0.119	0.015	0.765045	146.878
11.204	3.864	0.061	0.06	0.003	1.02653	14.551			12.308	9.482	0.053	0.035	0.001	0.453271	94.249			8.768	7.306	0.067	0.043	0.002	0.567271	31.269
5.805	3.862	0.029	0.026	0.0005818	0.880821	90			9.291	9.543	0.146	0.126	0.014	0.836243	77.825			16.837	7.347	0.132	0.128	0.013	0.949961	158.977
1.262	3.927	0.154	0.071	0.009	0.483182	52.184			4.352	9.566	0.336	0.16	0.042	0.473675	9.822			3.74	7.331	0.054	0.048	0.002	0.873278	104.947
2.483	3.891	0.058	0.05	0.002	0.75698	176.548			8.017	9.583	0.186	0.144	0.021	0.772865	20.34			15.889	7.338	0.056	0.039	0.002	0.812015	105.317
6.309	3.923	0.126	0.118	0.012	0.962388	139.242			17.612	9.537	0.051	0.038	0.002	0.979038	86.587			11.655	7.371	0.108	0.1	0.009	0.982438	104.989
11.09	3.919	0.103	0.102	0.008	0.96012	166.347			4.007	9.598	0.159	0.126	0.016	0.805816	11.265			3.623	7.354	0.048	0.032	0.001	0.552621	42.319
20.538	3.916	0.107	0.101	0.008	0.889677	5.786			9.414	9.585	0.069	0.054	0.003	0.802293	3.353			8.65	7.366	0.075	0.057	0.003	0.679061	24.974
1.85	3.886	0.036	0.032	0.0008992	0.883408	108.135			11.967	9.586	0.058	0.043	0.002	0.75698	6.781			11.336	7.388	0.086	0.078	0.005	0.860762	178.746
5.862	3.895	0.052	0.045	0.002	0.941745	0			19.053	9.629	0.184	0.132	0.019	0.714543	7.937			6.982	7.495	0.265	0.23	0.048	0.870281	129.02
10.16	3.902	0.03	0.03	0.0006876	0.972755	0			11.783	9.598	0.052	0.043	0.002	0.941745	23.389			7.165	7.395	0.042	0.034	0.001	0.721791	166.482
2.591	3.906	0.033	0.03	0.0007802	0.912196	7.275			17.847	9.735	0.379	0.25	0.075	0.664803	134.019			18.955	7.951	1.111	0.905	0.79	0.814909	77.045
4.109	3.946	0.073	0.067	0.004	0.955706	80.653			10.711	9.628	0.049	0.042	0.002	1.06059	134.086			16.213	7.422	0.063	0.042	0.002	0.641592	39.358
11.83	3.923	0.032	0.029	0.0007273	0.904323	31.56			17.349	9.635	0.058	0.05	0.002	0.75698	138.741			7.69	7.644	0.513	0.41	0.165	0.798288	165.334
3.302	3.94	0.055	0.043	0.002	0.841811	162.711			1.866	9.651	0.053	0.05	0.002	0.906543	27.305			15.619	7.453	0.061	0.056	0.003	1.02653	120.555
10.7	3.95	0.066	0.064	0.003	0.876887	48.9			11.65	9.662	0.108	0.081	0.007	0.764118	8.468			4.187	7.714	0.766	0.555	0.334	0.724768	175.456
20.827	3.944	0.035	0.03	0.0008331	0.865907	130.154			2.335	9.673	0.058	0.05	0.002	0.75698	168.54			14.442	7.503	0.122	0.117	0.011	0.940986	17.456
10.449	3.975	0.102	0.09	0.007	0.856659	1.673			2.041	9.697	0.085	0.073	0.005	0.881135	161.241			12.737	7.482	0.065	0.051	0.003	0.904075	61.686
8.462	3.949	0.03	0.03	0.0006876	0.972755	0			17.002	9.703	0.079	0.069	0.004	0.816048	55.555			4.973	7.537	0.036	0.029	0.0008237	0.809234	119.665
1.83	4.005	0.162	0.128	0.016	0.776247	17.197			1.704	9.747	0.129	0.081	0.008	0.612098	12.237			12.824	7.561	0.078	0.063	0.004	0.837107	76.442
3.098	3.957	0.05	0.038	0.001	0.509296	1.509			4.55	9.752	0.097	0.087	0.007	0.94725	169.093			15.426	7.626	0.202	0.189	0.03	0.936114	107.973
3.602	3.957	0.027	0.026	0.0005554	0.970037	90			6.007	9.804	0.246	0.196	0.038	0.799509	3.105			7.378	7.568	0.087	0.068	0.005	0.841088	16.622
2.012	3.968	0.033	0.028	0.0007273	0.850346	166.485			8.442	9.807	0.156	0.124	0.015	0.784788	115.277			21.799	7.795	0.6	0.507	0.239	0.84529	176.87
2.433	3.975	0.051	0.043	0.002	0.979038	132.458			7.411	10.024	0.811	0.411	0.262	0.507189	24.601			3.492	7.576	0.079	0.059	0.004	0.816048	11.706
5.168	4.049	0.188	0.175	0.026	0.936629	155.55			11.922	9.778	0.039	0.032	0.000955	0.799437	3.508			11.714	7.593	0.061	0.051	0.002	0.684353	42.635
15.622	3.979	0.029	0.027	0.0006215	0.940926	173.29			6.386	9.954	0.383	0.311	0.093	0.807227	173.946			16.993	7.61	0.1	0.079	0.006	0.763944	1.89
11.974	4.01	0.094	0.088	0.006	0.864581	44.439			8.927	9.854	0.121	0.103	0.01	0.86964	52.754			12.653	7.602	0.041	0.038	0.001	0.75743	81.38
8.711	4.002	0.069	0.06	0.003	0.802293	26.346			11.655	9.845	0.092	0.077	0.006	0.90258	158.417			12.142	8.33	1.942	1.383	2.11	0.712351	170.287
8.552	3.99	0.029	0.027	0.0006215	0.940926	135			4.093	10.214	1.053	0.683	0.565	0.648787	153.756			20.09	7.703	0.2	0.16	0.025	0.795775	0.013
15.222	3.997	0.052	0.044	0.002	0.941745	5.6			16.676	9.859	0.07	0.059	0.003	0.779534	172.231			14.428	7.721	0.123	0.114	0.011	0.925748	153.073
9.618	4	0.03	0.03	0.0006876	0.972755	0			11.316	9.86	0.065	0.053	0.003	0.904075	1.34			12.846	7.703	0.079	0.071	0.004	0.816048	56.288
18.364	4.023	0.069	0.068	0.004	1.06972	47.539			6.795	9.978	0.362	0.26	0.074	0.718993	173.642			14.763	7.716	0.079	0.062	0.004	0.816048	46.785
3.073	4.022	0.03	0.029	0.0007008	0.991429	54.462			11.557	9.881	0.048	0.033	0.001	0.552621	160.376			16.587	7.757	0.118	0.097	0.009	0.822979	6.561
8.831	4.037	0.038	0.037	0.001	0.881745	77.179			3.262	9.938	0.149	0.113	0.013	0.745557	117.011			8.165	7.727	0.045	0.031	0.001	0.62876	167.741
13.682	4.078	0.128	0.127	0.013	1.01026	3.153			11.822	9.94	0.134	0.098	0.01	0.709089	94.053			15.056	7.973	0.597	0.483	0.226	0.807365	170.027
15.439	4.076	0.131	0.121	0.012	0.890325	156.646			7.859	9.923	0.101	0.078	0.006	0.748891	47.411			4.708	7.801	0.139	0.119	0.013	0.85669	147.8
18.792	4.044	0.068	0.053	0.003	0.826064	170.053			8.367	10.019	0.293	0.256	0.059	0.875038	95.807			19.972	7.783	0.073	0.063	0.004	0.955706	51.734
10.384	4.037	0.031	0.028	0.0006744	0.89352	81.814			16.286	10.025	0.298	0.223	0.052	0.745557	119.147			6.075	7.824	0.102	0.092	0.007	0.856659	165.645
11.406	4.035	0.028	0.026	0.0005686	0.923423	30.054			11.193	9.945	0.11	0.094	0.008	0.841811	167.693			16.832	7.855	0.175	0.157	0.022	0.914654	2.187
7.979	4.046	0.04	0.037	0.001	0.795775	70.573			1.838	9.946	0.057	0.05	0.002	0.783773	22.3			7.049	8.201	0.858	0.81	0.546	0.94434	168.486
9.839	4.056	0.059	0.054	0.002	0.731537	100.777			16.694	9.957	0.068	0.053	0.003	0.826064	0.471			3.43	7.811	0.045	0.041	0.001	0.62876	24.98
2.589	4.044	0.03	0.03	0.0006876	0.972755	0			10.693	10.261	0.789	0.521	0.323	0.660631	36.045			13.836	8.098	0.692	0.601	0.327	0.869452	178.883
22.53	4.069	0.083	0.074	0.005	0.924111	174.934			11.922	9.987	0.042	0.038	0.001	0.721791	26.565			8.158	7.827	0.034	0.025	0.0006627	0.72991	145.935
3.116	4.055	0.035	0.03	0.0008198	0.852083	180			11.446	10.041	0.106	0.085	0.007	0.793225	51.448			16.572	7.859	0.096	0.079	0.006	0.828932	5.997
10.011	4.053	0.029	0.026	0.000595	0.900806	12.207			16.028	10.154	0.291	0.22	0.05	0.751786	59.784			16.15	7.853	0.05	0.043	0.002	1.01859	124.839
10.786	4.057	0.041	0.037	0.001	0.75743	134.996			8.027	10.066	0.115	0.086	0.008	0.770202	66.23			14.315	7.889	0.051	0.039	0.002	0.979038	140.96
13.177	4.063	0.051	0.044	0.002	0.979038	168.079			16.65	10.071	0.118	0.096	0.009	0.822979	176.951			22.15	7.899	0.059	0.053	0.002	0.731537	13.596
6.126	4.063	0.033	0.028	0.0007273	0.850346	129.217			11.269	10.076	0.066	0.06	0.003	0.876887	132.773			5.037	8.409	1.145	0.927	0.833	0.808992	34.513
16.181	4.094	0.112	0.099	0.009	0.913517	4.287			4.519	10.094	0.087	0.064	0.004	0.672871	179.338			13.102	7.939	0.084	0.063	0.004	0.721791	45.109
9.973	4.08	0.049	0.043	0.002	1.06059	93.051			7.943	10.092	0.06	0.058	0.003	1.06103	112.682			8.39	7.923	0.046	0.025	0.0008899	0.535471	8.033
3.41	4.078	0.044	0.038	0.001	0.657665	52.423			11.34	10.41	0.756	0.497	0.295	0.657186	35.105			7.895	8.059	0.206	0.181	0.029	0.870109	44.798
18.248	4.079	0.03	0.029	0.0006744	0.954081	156.731			2.875	10.244	0.283	0.242	0.054	0.858482	126.591			9.02	7.996	0.047	0.036	0.001	0.576387	156.423
2.77	4.087	0.039	0.034	0.001	0.837107	129.704			6.354	10.159	0.142	0.101	0.011	0.694586	163.111			20.22	8.023	0.046	0.038	0.001	0.60172	38.475
20.291	4.093	0.038	0.037	0.001	0.881745	0			11.879	10.135	0.049	0.038	0.001	0.530296	152.601			19.63	8.08	0.157	0.142	0.017	0.878132	98.75
3.337	4.106	0.052	0.044	0.002	0.941745	164.619			16.821	10.269	0.288	0.218	0.049	0.752179	177.936			17.436	8.23	0.507	0.436	0.173	0.85692	178.109
7.581	4.112	0.047	0.043	0.002	1.15277	134.994			8.287	10.301	0.279	0.179	0.039	0.63792	119.344			4.344	8.066	0.062	0.049	0.002	0.662456	157.436
12.492	4.11	0.046	0.037	0.001	0.60172	160.973			16.355	10.196	0.047	0.042	0.002	1.15277	142.513			9.185	8.06	0.039	0.034	0.001	0.837107	177.169
7.718	4.113	0.041	0.03	0.0009653	0.731147	10.184			16.534	10.211	0.05	0.046	0.002	1.01859	164.829			20.355	8.321	0.533	0.501	0.21	0.941185	37.19
7.869	4.13	0.071	0.069	0.004	1.01031	30.276			6.617	10.256	0.117	0.091	0.008	0.744095	140.311			18.069	8.224	0.363	0.294	0.084	0.811664	18.061
21.536	4.124	0.052	0.051	0.002	0.941745	82.118			7.564	10.246	0.076	0.074	0.004	0.881745	172.275			9	8.78	1.628	1.342	1.717	0.824844	156.36
14.462	4.116	0.03	0.03	0.0006876	0.972755	0			6.434	10.26	0.089	0.068	0.005	0.803711	169.837			21.7	8.136	0.088	0.082	0.006	0.986498	58.792
2.601	4.185	0.18	0.147	0.021	0.825248	134.307			15.618	10.272	0.116	0.101	0.009	0.851602	163.416			21.872	8.154	0.083	0.075	0.005	0.924111	64.485
6.903	4.2	0.201	0.193	0.03	0.945452	166.648			15.79	10.3	0.143	0.071	0.008	0.498113	105.599			10.3	8.208	0.21	0.177	0.029	0.837278	139.861
12.259	4.12	0.029	0.028	0.0006347	0.96091	90			13.536	10.293	0.043	0.031	0.001	0.68861	153.942			16.959	8.322	0.373	0.33	0.097	0.887696	153.825
22.801	4.121	0.029	0.027	0.0006083	0.920941	60.972			3.203	10.324	0.105	0.083	0.007	0.808406	29.171			14.359	8.223	0.124	0.103	0.01	0.828069	147.508
10.183	4.124	0.035	0.03	0.0008331	0.865907	21.951			16.631	10.34	0.09	0.08	0.006	0.94314	32.772			8.091	8.23	0.077	0.07	0.004	0.858991	31.729
21.664	4.139	0.064	0.052	0.003	0.932548	6.984			6.47	10.334	0.078	0.059	0.004	0.837107	6.18			16.184	8.27	0.175	0.132	0.018	0.748353	22.343
12.08	4.141	0.052	0.044	0.002	0.941745	38.488			15.075	10.368	0.134	0.098	0.01	0.709089	19.931			19.805	8.326	0.24	0.166	0.031	0.68525	60.407
10.585	4.145	0.052	0.045	0.002	0.941745	90			13.551	10.509	0.504	0.337	0.133	0.666654	2.272			4.359	8.289	0.152	0.136	0.016	0.881745	137.704
13.509	4.138	0.043	0.036	0.001	0.68861	178.019			4.802	10.439	0.133	0.079	0.008	0.575833	159.145			21.712	8.291	0.112	0.103	0.009	0.913517	26.304
3.098	4.136	0.029	0.026	0.0005818	0.880821	0			12.489	10.551	0.46	0.3	0.108	0.649858	179.641			6.024	8.525	0.585	0.542	0.249	0.926398	5.409
2.894	4.142	0.029	0.028	0.0006479	0.980894	156.888			6.813	10.456	0.084	0.078	0.005	0.902239	98.81			7.776	8.29	0.099	0.074	0.006	0.779455	26.409
13.785	4.149	0.029	0.028	0.0006347	0.96091	90			7.625	10.905	1.103	0.517	0.448	0.468853	54.664			15.256	8.332	0.18	0.14	0.02	0.78595	167.854
22.219	4.152	0.029	0.028	0.0006479	0.980894	113.112			3.67	10.482	0.056	0.043	0.002	0.812015	161.396			3.544	8.347	0.197	0.163	0.025	0.820196	4.969
4.804	4.204	0.164	0.133	0.017	0.804769	3.887			15.113	10.705	0.605	0.386	0.183	0.636576	36.365			8.172	8.284	0.037	0.028	0.0008142	0.757247	85.34
3.606	4.16	0.029	0.026	0.000595	0.900806	102.207			3.035	10.978	1.57	0.896	1.105	0.570786	165.019			14.81	8.358	0.172	0.139	0.019	0.817724	22.748
13.083	4.184	0.075	0.068	0.004	0.905415	89.928			5.72	10.507	0.058	0.046	0.002	0.75698	19.25			16.023	8.319	0.05	0.043	0.002	1.01859	174.167
8.21	4.168	0.036	0.029	0.0008198	0.805403	49.2			7.05	10.554	0.138	0.103	0.011	0.735436	141.35			22.02	8.341	0.067	0.046	0.002	0.567271	85.672
11.568	4.168	0.029	0.028	0.0006479	0.980894	66.888			10.924	10.522	0.07	0.063	0.003	0.779534	149.889			14.307	8.333	0.038	0.036	0.001	0.881745	59.185
18.102	4.176	0.029	0.026	0.0005818	0.880821	0			12.795	10.518	0.056	0.047	0.002	0.812015	178.277			7.809	8.4	0.074	0.072	0.004	0.930051	96.05
21.705	4.177	0.029	0.028	0.0006347	0.96091	180			4.788	10.523	0.059	0.043	0.002	0.731537	2.255			7.679	8.43	0.113	0.099	0.009	0.89742	105.529
3.031	4.181	0.028	0.026	0.0005686	0.923423	120.054			4.656	10.546	0.073	0.056	0.003	0.71678	144.889			10.675	8.406	0.051	0.043	0.002	0.979038	129.643
5.566	4.204	0.058	0.051	0.002	0.75698	14.696			5.685	10.57	0.048	0.048	0.002	1.10524	21.801			15.037	8.448	0.145	0.108	0.012	0.7267	26.719
7.167	4.204	0.057	0.051	0.002	0.783773	7.15			5.838	10.581	0.077	0.063	0.004	0.858991	133.009			4.378	8.41	0.038	0.031	0.0009373	0.826459	101.09
11.783	4.249	0.164	0.148	0.019	0.899448	144.501			6.594	10.753	0.547	0.25	0.107	0.455323	135.627			14.377	8.47	0.078	0.071	0.004	0.837107	76.764
2.989	4.208	0.03	0.028	0.0006612	0.935407	135			4.995	10.673	0.333	0.162	0.042	0.482249	165.108			18.282	8.466	0.074	0.063	0.004	0.930051	39.335
3.065	4.251	0.125	0.116	0.011	0.896361	158.449			11.93	10.609	0.058	0.055	0.002	0.75698	161.174			3.679	8.481	0.094	0.088	0.006	0.864581	64.258
11.048	4.213	0.045	0.037	0.001	0.62876	73.268			6.22	10.669	0.16	0.152	0.019	0.944982	35.6			17.848	8.478	0.094	0.074	0.005	0.720484	37.926
5.995	4.219	0.024	0.023	0.0004364	0.964656	135			5.265	10.644	0.158	0.102	0.013	0.663039	176.712			17.982	8.507	0.147	0.132	0.015	0.883826	32.236
10.08	4.291	0.145	0.143	0.016	0.968934	149.733			5.578	10.632	0.071	0.051	0.003	0.75773	170.469			17.255	8.489	0.081	0.068	0.004	0.776247	63.412
9.015	4.313	0.14	0.135	0.015	0.974418	119.649			5.707	10.638	0.071	0.062	0.003	0.75773	179.633			10.374	8.495	0.085	0.069	0.005	0.881135	90
7.203	4.277	0.061	0.053	0.003	1.02653	172.688			11.739	10.706	0.173	0.163	0.022	0.935924	77.74			3.344	8.509	0.106	0.085	0.007	0.793225	36.197
3.521	4.298	0.067	0.064	0.003	0.850906	127.737			12.776	10.683	0.118	0.089	0.008	0.731537	170.305			15.444	8.666	0.556	0.387	0.169	0.696061	16.81
5.813	4.284	0.034	0.03	0.0007934	0.873865	0			8.313	10.704	0.1	0.093	0.007	0.891268	46.199			22.262	8.645	0.37	0.309	0.09	0.837046	39.939
15.537	4.293	0.048	0.039	0.001	0.552621	172.5			11.585	10.693	0.072	0.045	0.003	0.736828	145.256			10.28	8.519	0.083	0.065	0.004	0.739288	91.019
20.075	4.319	0.113	0.095	0.008	0.797707	18.788			5.557	10.774	0.283	0.207	0.046	0.731299	20.36			7.785	8.535	0.087	0.081	0.006	1.00931	159.212
19.919	4.29	0.028	0.026	0.0005818	0.944861	80.707			4.104	10.761	0.161	0.125	0.016	0.78592	114.444			19.451	8.565	0.149	0.117	0.014	0.802908	83.688
5.533	4.412	0.354	0.267	0.074	0.751857	177.115			5.798	10.711	0.055	0.044	0.002	0.841811	131.006			16	8.544	0.059	0.058	0.003	1.0973	47.027
2.842	4.306	0.027	0.026	0.0005554	0.970037	90			15.446	10.723	0.069	0.066	0.004	1.06972	97.732			21.517	8.569	0.113	0.093	0.008	0.797707	47.332
5.935	4.304	0.029	0.026	0.0005818	0.880821	0			3.74	10.754	0.093	0.081	0.006	0.883274	84.335			9.936	8.574	0.102	0.091	0.007	0.856659	133.023
6.474	4.31	0.034	0.03	0.0008198	0.902943	34.43			6.086	10.766	0.116	0.087	0.008	0.75698	141.645			3.503	8.565	0.048	0.04	0.002	1.10524	53.445
16.977	4.309	0.032	0.03	0.0007537	0.937149	15.573			8.043	10.778	0.119	0.063	0.006	0.53947	75.108			13.909	8.962	0.963	0.705	0.534	0.73316	154.96
22.078	4.35	0.124	0.11	0.011	0.910876	12.55			11.976	10.752	0.068	0.065	0.003	0.826064	12.42			10.555	8.915	0.733	0.652	0.375	0.888656	153.267
10.462	4.327	0.061	0.054	0.003	1.02653	0			13.686	10.81	0.102	0.086	0.007	0.856659	171.855			14.266	8.625	0.092	0.086	0.006	0.90258	55.378
10.57	4.32	0.041	0.037	0.001	0.75743	15.141			3.9	10.846	0.153	0.107	0.013	0.707083	101.907			19.696	8.646	0.149	0.129	0.015	0.860258	141.289
13.833	4.319	0.029	0.028	0.0006347	0.96091	180			5.094	10.823	0.113	0.069	0.006	0.59828	109.323			16.017	8.617	0.075	0.064	0.004	0.905415	34.297
2.431	4.331	0.029	0.026	0.000595	0.900806	102.207			8.269	10.832	0.1	0.071	0.006	0.763944	88.722			14.872	8.725	0.315	0.228	0.056	0.718583	22.196
6.596	4.329	0.029	0.026	0.0005818	0.880821	0			5.229	10.918	0.305	0.197	0.047	0.643292	25.551			14.554	8.643	0.079	0.059	0.004	0.816048	24.074
13.284	4.339	0.047	0.043	0.002	1.15277	134.994			4.722	10.846	0.066	0.056	0.003	0.876887	174.834			3.282	8.682	0.151	0.127	0.015	0.837621	8.161
4.497	4.394	0.128	0.123	0.012	0.932548	162.213			9.901	10.89	0.142	0.085	0.01	0.631442	159.872			2.421	8.755	0.281	0.233	0.051	0.822371	149.937
17.783	4.411	0.17	0.162	0.022	0.969248	100.039			4.575	10.934	0.249	0.122	0.024	0.492859	150.744			10.017	8.684	0.101	0.093	0.007	0.873706	2.586
23.062	4.376	0.082	0.074	0.005	0.946787	0.454			6.161	10.909	0.114	0.079	0.007	0.685802	137.52			7.718	8.845	0.49	0.403	0.155	0.821958	6.72
8.52	4.386	0.088	0.08	0.006	0.986498	15.655			6.175	12.211	2.43	1.421	2.713	0.584989	108.707			17.833	8.686	0.091	0.078	0.006	0.922526	13.293
13.075	4.363	0.03	0.027	0.0006347	0.897917	90			4.068	10.923	0.069	0.05	0.003	0.802293	179.265			18.68	8.836	0.344	0.284	0.077	0.828484	55.426
1.662	4.378	0.061	0.054	0.003	1.02653	0			4.438	11.02	0.197	0.117	0.018	0.590541	152.111			2.743	8.755	0.173	0.156	0.021	0.893382	17.478
7.731	4.375	0.04	0.032	0.001	0.795775	0			6.008	10.974	0.061	0.048	0.002	0.684353	173.374			3.952	8.756	0.059	0.056	0.003	1.0973	166.591
21.48	4.377	0.029	0.028	0.0006347	0.96091	180			4.077	10.978	0.062	0.028	0.001	0.331228	6.044			21.599	8.976	0.481	0.439	0.166	0.913541	29.385
11.07	4.389	0.031	0.03	0.0007273	0.963608	56.644			3.945	11.001	0.06	0.054	0.003	1.06103	1.925			20.862	8.893	0.262	0.221	0.046	0.853229	47.317
15.325	4.394	0.034	0.029	0.0007802	0.859327	9.1			4.099	11.083	0.192	0.137	0.021	0.725315	157.054			3.03	8.862	0.163	0.147	0.019	0.910518	64.972
11.767	4.404	0.052	0.045	0.002	0.941745	0			6.445	11.078	0.095	0.056	0.004	0.564317	110.998			18.028	8.9	0.268	0.215	0.045	0.797725	25.764
18.114	4.399	0.033	0.029	0.0007537	0.881213	1.32			6.684	11.13	0.217	0.168	0.029	0.784131	152.314			10.085	8.83	0.044	0.031	0.001	0.657665	39.037
10.964	4.402	0.029	0.026	0.000595	0.900806	167.793			4.78	11.584	1.054	0.664	0.549	0.629218	44.666			3.453	8.888	0.129	0.068	0.007	0.535585	99.715
21.452	4.401	0.025	0.024	0.0004628	0.942808	45.003			4.619	11.086	0.064	0.049	0.002	0.621699	170.742			16.586	8.889	0.11	0.088	0.008	0.841811	40.213
10.905	4.423	0.03	0.029	0.0006876	0.972755	45			5.095	11.098	0.062	0.049	0.002	0.662456	46.815			19.696	8.889	0.089	0.073	0.005	0.803711	156.615
2.065	4.448	0.081	0.075	0.005	0.970309	176.547			4.263	11.096	0.08	0.041	0.003	0.596831	173.193			2.156	8.942	0.169	0.105	0.014	0.624115	30.456
20.279	4.433	0.029	0.026	0.000595	0.900806	107.383			5.426	11.116	0.072	0.061	0.003	0.736828	179.346			13.295	8.976	0.209	0.172	0.028	0.816161	7.609
10.72	4.458	0.067	0.067	0.004	1.13454	0			6.828	11.12	0.053	0.046	0.002	0.906543	81.532			16.836	8.941	0.105	0.088	0.007	0.808406	128.769
11.003	4.441	0.03	0.029	0.0006876	0.972755	45			8.34	11.138	0.065	0.055	0.003	0.904075	25.005			18.347	8.938	0.071	0.064	0.004	1.01031	129.038
16.312	4.469	0.067	0.06	0.003	0.850906	6.561			8.117	11.144	0.056	0.042	0.002	0.812015	84.327			4.119	8.968	0.121	0.1	0.01	0.86964	38.151
16.684	4.465	0.04	0.04	0.001	0.795775	0			5.321	11.157	0.088	0.062	0.004	0.657665	166.335			2.477	9.049	0.256	0.253	0.051	0.990833	65.005
18.229	4.464	0.039	0.031	0.0009388	0.785876	75.368			4.362	11.166	0.102	0.075	0.006	0.734279	151.646			7.319	9.106	0.427	0.365	0.122	0.85195	169.745
20.43	4.463	0.028	0.026	0.0005686	0.923423	30.054			8.192	11.388	0.459	0.245	0.088	0.531823	66.574			20.187	9.086	0.321	0.303	0.076	0.939104	74.897
10.785	4.467	0.025	0.024	0.0004628	0.942808	0			6.822	11.188	0.064	0.059	0.003	0.932548	50.284			14.461	8.978	0.083	0.066	0.004	0.739288	3.983
2.142	4.512	0.106	0.098	0.008	0.906543	15.425			6.931	11.313	0.275	0.179	0.039	0.656613	99.98			12.968	9.091	0.266	0.225	0.047	0.845755	86.179
9.847	4.774	0.682	0.612	0.328	0.897874	168.478			5.456	11.248	0.115	0.096	0.009	0.866477	171.598			10.152	9.019	0.088	0.086	0.006	0.986498	29.301
19.101	4.492	0.061	0.057	0.003	1.02653	45			4.358	11.323	0.167	0.14	0.018	0.821769	4.48			22.158	9.258	0.611	0.541	0.259	0.883339	163.536
20.083	4.48	0.039	0.031	0.0009653	0.808059	62.777			4.577	11.336	0.07	0.062	0.003	0.779534	140.793			2.766	9.093	0.103	0.079	0.006	0.72009	115.925
20.328	4.48	0.03	0.028	0.0006612	0.935407	45.004			4.478	11.353	0.05	0.045	0.002	1.01859	132.955			15.905	9.148	0.263	0.186	0.038	0.699491	11.773
10.354	4.485	0.026	0.026	0.0005421	1.02104	90			5.627	11.393	0.147	0.086	0.01	0.589217	129.312			15.504	9.125	0.171	0.101	0.014	0.609601	32.334
4.134	4.531	0.1	0.091	0.007	0.891268	109.282			7.427	11.346	0.039	0.034	0.001	0.837107	66.071			9.725	9.105	0.086	0.07	0.005	0.860762	68.192
20.276	4.497	0.029	0.026	0.000595	0.900806	12.207			2.482	11.371	0.096	0.065	0.005	0.690777	174.85			10.059	9.264	0.371	0.336	0.098	0.906543	175.523
2.59	4.913	0.851	0.525	0.351	0.617104	112.2			7.968	11.38	0.06	0.048	0.002	0.707355	110.844			16.157	9.148	0.101	0.094	0.007	0.873706	165.983
10.864	4.513	0.029	0.026	0.0005818	0.880821	90			4.13	11.429	0.277	0.118	0.026	0.431443	168.552			14.726	9.321	0.738	0.406	0.235	0.54937	18.419
2.239	4.546	0.088	0.066	0.005	0.822081	4.06			7.453	11.397	0.051	0.041	0.002	0.979038	161.419			2.908	9.251	0.252	0.181	0.036	0.721791	1.388
6.938	4.567	0.12	0.107	0.01	0.884194	48.052			4.43	11.43	0.055	0.046	0.002	0.841811	45.001			9.7	9.21	0.068	0.059	0.003	0.826064	154.327
13.902	4.548	0.078	0.064	0.004	0.837107	30.158			7.45	11.515	0.257	0.073	0.015	0.289158	128.664			6.74	9.299	0.284	0.175	0.039	0.615656	20.42
20.615	4.53	0.041	0.036	0.001	0.75743	157.703			5.256	11.527	0.149	0.104	0.012	0.688207	140.828			15.595	9.26	0.157	0.128	0.016	0.826477	11.965
22.131	4.571	0.084	0.072	0.005	0.902239	28.957			8.331	11.569	0.197	0.136	0.021	0.688965	44.429			20.877	9.393	0.559	0.361	0.158	0.643789	28.566
9.263	4.572	0.045	0.041	0.001	0.62876	45.006			5.542	11.498	0.057	0.044	0.002	0.783773	10.47			4.134	9.275	0.049	0.046	0.002	1.06059	45
19.035	6.083	4.902	2.953	11.37	0.602454	5.484			3.951	11.546	0.157	0.103	0.013	0.671513	134.281			12.107	9.279	0.059	0.043	0.002	0.731537	86.229
10.409	4.596	0.029	0.026	0.000595	0.900806	102.207			7.914	11.576	0.211	0.109	0.018	0.514775	28.612			15.377	9.283	0.066	0.052	0.003	0.876887	68.943
9.01	4.601	0.03	0.029	0.0006744	0.954081	28.552			3.41	11.621	0.284	0.201	0.045	0.710372	16.377			21.282	9.296	0.093	0.082	0.006	0.883274	49.728
8.645	4.608	0.03	0.027	0.0006347	0.897917	90			7.07	11.584	0.08	0.053	0.003	0.596831	141.163			20.38	9.322	0.132	0.115	0.012	0.876887	131.825
22.6	4.609	0.029	0.026	0.0005818	0.880821	0			6.895	11.621	0.149	0.085	0.01	0.573505	148.399			16.983	9.318	0.09	0.056	0.004	0.62876	44.826
14.68	4.616	0.029	0.026	0.0005818	0.880821	0			7.262	11.71	0.254	0.116	0.023	0.453911	133.876			4.529	9.352	0.131	0.12	0.012	0.890325	18.869
5.99	4.673	0.132	0.115	0.012	0.876887	138.164			2.976	11.657	0.114	0.056	0.005	0.489858	163.616			15.981	9.313	0.05	0.043	0.002	1.01859	15.127
7.513	4.638	0.07	0.066	0.004	1.03938	138.044			3.618	11.685	0.178	0.088	0.012	0.482227	29.532			16.277	9.313	0.042	0.037	0.001	0.721791	49.503
7.785	4.652	0.099	0.089	0.007	0.909364	27.609			8.016	11.65	0.076	0.043	0.003	0.661309	8.757			4.721	9.322	0.057	0.047	0.002	0.783773	15.79
15.825	4.627	0.045	0.042	0.002	1.25752	11.767			8.359	11.744	0.198	0.162	0.025	0.811932	131.768			10.857	9.359	0.12	0.118	0.011	0.972614	95.501
16.939	4.71	0.213	0.205	0.034	0.954179	152.888			4.117	11.718	0.151	0.119	0.014	0.781779	146.546			6.353	9.409	0.195	0.171	0.026	0.870591	6.8
20.644	4.622	0.03	0.03	0.0006876	0.972755	0			7.969	11.749	0.32	0.119	0.03	0.373019	15.235			4.237	9.372	0.089	0.074	0.005	0.803711	173.719
11.533	4.64	0.045	0.039	0.001	0.62876	0			7.08	11.774	0.19	0.14	0.021	0.740666	108.522			11.183	9.366	0.062	0.061	0.003	0.993683	143.439
4.679	4.647	0.045	0.037	0.001	0.62876	160.642			3.743	11.737	0.076	0.059	0.004	0.881745	126.175			16.627	9.468	0.237	0.184	0.034	0.770712	32.435
5.251	4.669	0.087	0.078	0.005	0.841088	43.374			6.891	11.788	0.19	0.138	0.021	0.740666	138.602			21.215	9.425	0.134	0.112	0.012	0.850906	14.411
13.59	4.643	0.029	0.028	0.0006479	0.980894	113.112			6.709	11.785	0.159	0.145	0.018	0.906543	6.588			11.991	9.419	0.1	0.082	0.006	0.763944	95.476
4.145	4.657	0.048	0.04	0.002	1.10524	78.859			8.154	11.917	0.307	0.205	0.049	0.661956	64.476			13.719	9.502	0.259	0.236	0.048	0.91107	67.741
14.639	4.647	0.031	0.031	0.0007405	0.981097	90			5.308	11.779	0.041	0.037	0.001	0.75743	96.843			14.035	9.404	0.069	0.056	0.003	0.802293	67.089
1.894	4.675	0.076	0.071	0.004	0.881745	43.358			3.687	11.805	0.068	0.048	0.003	0.826064	152.804			20.291	9.472	0.182	0.164	0.023	0.884087	5.11
4.874	4.936	0.61	0.562	0.269	0.920455	39.625			3.801	11.84	0.125	0.061	0.006	0.488924	144.594			21.606	9.441	0.108	0.103	0.009	0.982438	130.383
21.945	4.675	0.059	0.052	0.002	0.731537	1.131e-13			3.307	11.902	0.211	0.147	0.024	0.686367	170.627			11.78	9.478	0.168	0.153	0.02	0.902239	55.802
5.76	4.7	0.089	0.075	0.005	0.803711	136.337			7.711	11.973	0.295	0.165	0.038	0.555968	84.32			12.9	9.43	0.064	0.051	0.003	0.932548	117.294
2.907	4.685	0.042	0.031	0.001	0.721791	69.351			4.164	11.915	0.079	0.046	0.003	0.612036	16.635			11.065	9.579	0.313	0.244	0.06	0.779781	119.189
9.276	4.681	0.029	0.028	0.0006347	0.96091	2.345e-12			3.64	11.936	0.084	0.048	0.003	0.541343	147.885			12.117	9.52	0.181	0.152	0.022	0.855019	64.854
12.378	5.815	2.829	2.217	4.925	0.783521	167.678			4.2	11.981	0.119	0.072	0.007	0.629382	12.819			3.353	9.472	0.075	0.064	0.004	0.905415	164.294
21.623	4.699	0.054	0.05	0.002	0.873278	45.011			3.459	12.013	0.13	0.114	0.012	0.904075	129.15			3.947	9.477	0.08	0.075	0.005	0.994718	155.334
10.544	4.69	0.03	0.027	0.0006479	0.916591	100.618			4.041	12.007	0.257	0.068	0.014	0.269881	165.804			13.921	9.463	0.056	0.041	0.002	0.812015	159.494
3.055	4.697	0.039	0.033	0.001	0.837107	154.027			7.391	12.413	1.169	0.469	0.431	0.401567	127.124			15.51	9.549	0.176	0.144	0.02	0.822081	45.049
20.583	4.724	0.088	0.056	0.004	0.657665	136.843			3.206	12.015	0.096	0.07	0.005	0.690777	161.011			8.21	9.508	0.077	0.063	0.004	0.858991	146.826
4.546	4.705	0.039	0.035	0.001	0.837107	32.01			4.733	12.083	0.219	0.168	0.029	0.769874	133.685			8.507	9.543	0.163	0.153	0.02	0.95844	10.401
3.144	4.707	0.04	0.03	0.0009521	0.757657	14.912			5.078	12.017	0.059	0.047	0.002	0.731537	86.16			9.662	9.511	0.074	0.069	0.004	0.930051	132.581
7.575	4.774	0.173	0.17	0.023	0.978466	165.543			3.65	12.081	0.125	0.097	0.01	0.814873	0.577			4.523	9.561	0.178	0.174	0.024	0.964454	4.262
21.82	4.713	0.029	0.026	0.0005818	0.880821	90			6.816	12.097	0.101	0.089	0.007	0.873706	96.35			10.523	9.504	0.049	0.043	0.002	1.06059	36.58
9.104	4.716	0.04	0.03	0.0009521	0.757657	171.102			5.169	12.13	0.094	0.077	0.006	0.864581	159.829			13.108	9.51	0.06	0.053	0.002	0.707355	77.954
9.214	4.768	0.128	0.12	0.012	0.932548	167.391			4.977	12.174	0.115	0.095	0.009	0.866477	42.029			3.201	9.519	0.077	0.071	0.004	0.858991	22.879
22.564	4.812	0.225	0.199	0.035	0.880264	10.197			7.845	12.344	0.407	0.203	0.065	0.499614	99.162			12.246	9.534	0.101	0.082	0.006	0.748891	63.546
4.339	4.768	0.104	0.094	0.008	0.941745	168.863			8.046	12.266	0.186	0.077	0.011	0.404834	19.433			14.075	9.513	0.038	0.031	0.0009278	0.818083	85.168
9.303	4.745	0.031	0.029	0.000714	0.945987	90			4.825	12.395	0.208	0.153	0.025	0.735738	142.668			15.222	9.52	0.085	0.056	0.004	0.704908	6.145
3.46	4.769	0.075	0.049	0.003	0.679061	164.255			8.087	12.389	0.147	0.122	0.014	0.824904	102.891			4.201	9.54	0.101	0.086	0.007	0.873706	28.462
13.179	4.774	0.069	0.061	0.003	0.802293	168.171			5.47	12.487	0.314	0.225	0.055	0.710254	132.438			14.119	9.517	0.032	0.026	0.0006438	0.8005	115.557
4.229	4.767	0.032	0.03	0.0007537	0.937149	38.776			5.07	12.476	0.278	0.152	0.033	0.543669	0.796			21.493	9.585	0.166	0.138	0.018	0.8317	18.248
17.446	4.789	0.074	0.072	0.004	0.930051	113.891			5.219	12.67	0.2	0.106	0.017	0.541127	85.801			11.667	9.543	0.052	0.044	0.002	0.941745	17.309
13.647	4.782	0.029	0.028	0.0006347	0.96091	90			5.374	12.624	0.056	0.045	0.002	0.812015	159.902			12.547	9.667	0.32	0.286	0.072	0.895247	35.536
9.368	4.789	0.029	0.028	0.0006479	0.980894	113.112			5.535	12.671	0.12	0.065	0.006	0.530516	170.743			12.919	9.588	0.16	0.137	0.017	0.845511	164.326
2.924	4.815	0.05	0.038	0.002	1.01859	176.594			5.549	12.82	0.324	0.118	0.03	0.363866	128.925			6.948	9.634	0.196	0.176	0.027	0.894874	27.379
4.044	5.007	0.506	0.407	0.162	0.805609	135.447			8.004	12.992	0.29	0.235	0.054	0.817538	1.472			11.316	9.581	0.062	0.052	0.003	0.993683	90.342
7.814	4.872	0.151	0.139	0.016	0.893462	8.419			5.727	13.017	0.153	0.103	0.012	0.652692	89.174			13.362	9.609	0.075	0.064	0.004	0.905415	86.177
5.542	4.845	0.051	0.051	0.002	0.979038	0			6.601	13.43	0.193	0.18	0.027	0.92291	116.085			5.725	9.683	0.348	0.199	0.054	0.567735	163.6
9.186	4.849	0.024	0.023	0.0004364	0.964656	90												7.355	9.7	0.244	0.192	0.037	0.791284	22.231
15.076	4.912	0.172	0.146	0.02	0.860762	4.399												15.111	9.701	0.24	0.194	0.036	0.795775	6.141
3.243	5.005	0.507	0.312	0.124	0.614209	164.25												13.05	9.679	0.088	0.08	0.005	0.822081	85.881
2.953	4.884	0.052	0.047	0.002	0.941745	5.222												11.998	9.707	0.15	0.123	0.015	0.848826	62.844
7.662	4.884	0.044	0.044	0.002	1.31533	0												9.02	9.68	0.05	0.045	0.002	1.01859	42.598
5.48	4.898	0.033	0.031	0.0008198	0.958496	90												4.279	9.724	0.094	0.087	0.006	0.864581	123.213
22.082	4.92	0.065	0.043	0.002	0.602717	176.945												13.468	9.713	0.051	0.04	0.002	0.979038	60.628
15.403	4.915	0.029	0.026	0.000595	0.900806	12.207												2.564	9.746	0.118	0.102	0.009	0.822979	12.872
8.338	5.002	0.192	0.175	0.026	0.89801	160.849												12.317	9.733	0.062	0.043	0.002	0.662456	38.716
22.01	4.943	0.029	0.027	0.0006215	0.940926	135												13.353	9.744	0.089	0.075	0.005	0.803711	134.96
9.349	4.95	0.029	0.028	0.0006347	0.96091	2.345e-12												3.565	9.734	0.062	0.049	0.002	0.662456	20.038
5.336	4.978	0.074	0.071	0.004	0.930051	51.797												4.594	9.758	0.081	0.075	0.005	0.970309	118.5
14.048	5.035	0.262	0.172	0.035	0.649196	8.504												11.246	9.766	0.099	0.097	0.008	1.03927	177.586
14.746	5.024	0.123	0.106	0.01	0.841589	36.215												11.459	9.79	0.132	0.12	0.012	0.876887	42.306
22.594	5.069	0.104	0.098	0.008	0.941745	167.744												9.323	9.805	0.151	0.145	0.017	0.949304	42.827
22.25	5.094	0.076	0.072	0.004	0.881745	40.365												13.964	9.772	0.063	0.054	0.003	0.962388	140.375
8.557	5.075	0.029	0.026	0.000595	0.900806	167.793												4.805	9.781	0.061	0.056	0.003	1.02653	113.713
8.016	5.08	0.028	0.026	0.0005818	0.944861	99.293												21.378	9.789	0.095	0.078	0.006	0.846475	40.132
8.979	5.126	0.126	0.104	0.01	0.80199	149.413												3.873	9.865	0.219	0.186	0.032	0.849517	90.247
2.332	5.091	0.045	0.031	0.001	0.62876	177.984												3.37	9.775	0.038	0.031	0.0009278	0.818083	154.343
14.653	5.143	0.146	0.115	0.013	0.776511	27.217												10.872	9.778	0.041	0.032	0.001	0.75743	53.16
15.531	5.097	0.034	0.03	0.0008198	0.902943	105.253												11.614	9.815	0.111	0.104	0.009	0.930051	98.071
8.597	5.151	0.116	0.109	0.01	0.946224	113.649												13.46	9.81	0.099	0.096	0.007	0.909364	145.386
3.029	5.126	0.048	0.04	0.001	0.552621	34.7												12.862	9.856	0.168	0.135	0.018	0.812015	163.367
13.764	5.141	0.076	0.069	0.004	0.881745	11.668												13.725	9.811	0.048	0.045	0.002	1.10524	42.007
3.499	5.156	0.081	0.079	0.005	0.970309	81.273												21.819	9.859	0.115	0.107	0.01	0.962752	67.447
5.865	5.166	0.079	0.066	0.004	0.816048	161.577												2.735	9.9	0.156	0.146	0.018	0.941745	157.068
5.743	5.151	0.029	0.028	0.0006347	0.96091	12.028												12.734	9.855	0.045	0.028	0.001	0.62876	107.133
2.319	5.235	0.272	0.157	0.033	0.567919	170.007												12.197	9.941	0.247	0.204	0.04	0.834788	32.217
11.139	5.16	0.031	0.03	0.0007273	0.963608	70.813												11.916	9.924	0.165	0.147	0.019	0.888579	31.167
3.772	5.19	0.109	0.047	0.004	0.428664	139.017												10.191	10.013	0.395	0.311	0.097	0.791567	162.549
3.585	5.255	0.263	0.125	0.026	0.478599	24.855												13.712	9.904	0.106	0.1	0.008	0.906543	129.689
14.524	5.195	0.086	0.071	0.005	0.860762	29.529												4.694	9.928	0.046	0.032	0.001	0.60172	72.907
15.069	5.167	0.016	0.016	0.0002116	1.05241	0												9.129	9.946	0.054	0.05	0.002	0.873278	151.388
2.136	5.186	0.036	0.032	0.0009124	0.896376	94.382												9.659	9.99	0.129	0.112	0.011	0.841634	123.019
4.273	5.198	0.06	0.058	0.003	1.06103	47.413												3.011	9.963	0.059	0.059	0.003	1.0973	16.195
7.184	5.19	0.047	0.043	0.002	1.15277	53.409												21.317	9.996	0.182	0.116	0.017	0.653456	157.838
22.22	5.208	0.03	0.027	0.0006347	0.897917	90												11.414	10.017	0.117	0.111	0.01	0.930119	106.794
21.412	5.221	0.029	0.026	0.000595	0.900806	107.383												4.934	10.112	0.317	0.272	0.068	0.86159	168.747
15.418	5.22	0.022	0.018	0.0003174	0.834972	160.395												4.099	10.077	0.181	0.162	0.023	0.893883	3.873
5.127	5.234	0.039	0.037	0.001	0.837107	102.779												9.17	10.038	0.075	0.067	0.004	0.905415	39.505
7.011	5.235	0.036	0.031	0.0008727	0.857374	103.881												5.628	10.138	0.509	0.231	0.092	0.452129	167.818
13.636	5.236	0.03	0.03	0.0006876	0.972755	0												9.546	10.044	0.078	0.07	0.004	0.837107	78.808
3.308	5.258	0.069	0.065	0.004	1.06972	125.878												4.438	10.104	0.176	0.156	0.022	0.904289	156.272
5.978	5.394	0.388	0.317	0.097	0.820386	163.372												3.794	10.108	0.066	0.064	0.003	0.876887	35.812
8.196	5.242	0.032	0.029	0.0007273	0.904323	80.927												11.867	10.142	0.136	0.109	0.012	0.826064	99.283
4.334	5.242	0.029	0.026	0.000595	0.900806	12.207												6.555	10.12	0.08	0.073	0.005	0.994718	6.314
4.383	5.265	0.071	0.064	0.004	1.01031	22.529												7.838	10.127	0.082	0.067	0.004	0.75743	3.909
6.306	5.27	0.084	0.075	0.005	0.902239	18.767												9.316	10.144	0.106	0.099	0.008	0.906543	31.779
5.007	5.436	0.457	0.384	0.138	0.841311	178.948												2.967	10.184	0.131	0.112	0.011	0.816132	96.02
4.305	5.265	0.03	0.03	0.0006876	0.972755	0												7.097	10.154	0.043	0.035	0.001	0.68861	37.911
15.514	5.269	0.019	0.015	0.0002248	0.792865	164.828												8.61	10.208	0.176	0.14	0.019	0.780977	6.55
22.416	5.341	0.161	0.142	0.018	0.88416	36.639												6.585	10.217	0.074	0.068	0.004	0.930051	0.454
3.904	5.281	0.03	0.027	0.0006347	0.897917	90												8.333	10.252	0.117	0.093	0.009	0.837107	27.581
6.633	5.599	0.761	0.662	0.396	0.870635	7.965												7.948	10.24	0.055	0.045	0.002	0.841811	177.651
14.842	5.301	0.054	0.052	0.002	0.873278	44.515												4.73	10.428	0.377	0.301	0.089	0.797292	131.832
3.944	5.296	0.029	0.026	0.0005818	0.880821	120.257												9.195	10.292	0.05	0.045	0.002	1.01859	90
5.407	5.295	0.029	0.028	0.0006479	0.980894	113.112												9.088	10.345	0.094	0.073	0.005	0.720484	0
5.222	5.308	0.047	0.038	0.001	0.576387	88.678												9.262	10.362	0.106	0.104	0.009	1.01986	90
7.281	5.301	0.032	0.03	0.0007405	0.920736	3.152												6.729	10.383	0.124	0.123	0.012	0.993683	178.739
11.025	5.304	0.036	0.032	0.000886	0.87044	128.82												4.931	10.365	0.068	0.056	0.003	0.826064	118.637
9.221	5.315	0.052	0.051	0.002	0.941745	41.818												5.118	10.379	0.04	0.027	0.0008331	0.66296	113.655
7.566	5.316	0.038	0.033	0.0009785	0.862787	119.218												2.157	10.403	0.071	0.053	0.003	0.75773	51.862
4.153	5.321	0.036	0.034	0.0009653	0.948347	74.402												9.87	10.41	0.05	0.043	0.002	1.01859	167.098
9.126	5.315	0.029	0.029	0.0006744	1.02101	45.018												6.218	10.424	0.069	0.048	0.003	0.802293	11.987
2.906	5.348	0.087	0.074	0.005	0.841088	81.522												9.132	10.456	0.145	0.114	0.013	0.787259	157.75
4.692	5.333	0.056	0.046	0.002	0.812015	31.961												7.882	10.469	0.119	0.094	0.009	0.809205	120.858
2.438	5.348	0.115	0.062	0.006	0.577651	27.225												8.06	10.437	0.055	0.048	0.002	0.841811	33.793
4.069	5.325	0.029	0.026	0.0005818	0.880821	0												8.234	10.51	0.163	0.142	0.018	0.862596	173.102
5.441	5.333	0.048	0.038	0.001	0.552621	154.811												8.92	10.531	0.187	0.161	0.024	0.873853	17.964
13.745	5.331	0.066	0.039	0.002	0.584591	178.87												6.838	10.52	0.108	0.094	0.008	0.873278	176.893
9.319	5.33	0.028	0.026	0.0005686	0.923423	45.002												6.422	10.512	0.043	0.028	0.0009373	0.645434	67.88
4.266	5.337	0.039	0.03	0.0009256	0.774826	105.563												3.958	10.593	0.189	0.178	0.026	0.926744	14.658
5.368	5.345	0.051	0.04	0.002	0.979038	23.974												7.972	10.526	0.045	0.041	0.001	0.62876	7.995
5.77	5.348	0.056	0.025	0.001	0.406008	124.066												7.058	10.628	0.225	0.197	0.035	0.880264	171.197
22.054	5.346	0.038	0.03	0.0008992	0.792865	52.549												4.576	10.613	0.179	0.12	0.017	0.675543	147.449
2.573	5.395	0.165	0.123	0.016	0.748277	6.922												5.39	10.632	0.141	0.135	0.015	0.960645	152.094
4.104	5.351	0.042	0.034	0.001	0.721791	171.741												7.86	10.619	0.037	0.025	0.0007101	0.660429	117.277
7.558	5.821	1.031	0.817	0.662	0.792959	67.973												6.718	10.629	0.049	0.037	0.001	0.530296	51.936
9.24	5.36	0.042	0.036	0.001	0.721791	0												8.084	10.708	0.195	0.155	0.024	0.803623	66.962
4.393	5.372	0.03	0.029	0.0006876	0.972755	134.989												4.745	10.654	0.058	0.043	0.002	0.75698	142.197
2.314	5.386	0.054	0.039	0.002	0.873278	152.831												5.695	10.735	0.25	0.186	0.037	0.753758	173
5.493	5.403	0.082	0.081	0.005	0.946787	136.48												7.682	10.694	0.139	0.115	0.012	0.790791	175.304
6.28	5.394	0.06	0.06	0.003	1.06103	0												7.34	10.682	0.053	0.03	0.001	0.453271	10.444
2.82	5.39	0.042	0.034	0.001	0.721791	172.347												8.391	10.828	0.286	0.253	0.057	0.887264	52.503
15.084	5.391	0.018	0.015	0.0002116	0.831535	90												5.474	10.723	0.04	0.035	0.001	0.795775	143.226
7.09	5.4	0.029	0.028	0.0006479	0.980894	66.888												4.596	10.908	0.372	0.293	0.085	0.782066	95.63
8.348	5.403	0.035	0.032	0.000886	0.92089	126.742												7.535	10.782	0.091	0.084	0.006	0.922526	14.586
4.374	5.412	0.03	0.028	0.0006479	0.916591	177.954												2.372	10.798	0.062	0.05	0.002	0.662456	115.752
5.625	5.423	0.045	0.041	0.001	0.62876	134.994												5.487	10.793	0.033	0.028	0.000729	0.852334	134.471
21.741	5.415	0.031	0.031	0.0007405	0.981097	90												8.168	10.845	0.067	0.062	0.003	0.850906	45.273
4.307	5.423	0.03	0.027	0.0006479	0.916591	79.382												7.608	10.845	0.039	0.034	0.001	0.837107	45.045
2.823	5.449	0.06	0.05	0.002	0.707355	115.453												8.095	10.883	0.046	0.038	0.001	0.60172	129.37
4.406	5.439	0.03	0.028	0.0006479	0.916591	87.954												3.397	10.938	0.116	0.104	0.01	0.946224	90
2.908	5.447	0.032	0.03	0.0007669	0.953562	1.822e-13												3.297	10.952	0.088	0.083	0.006	0.986498	90
4.753	5.448	0.03	0.028	0.0006612	0.935407	0												7.788	10.942	0.045	0.037	0.001	0.62876	122.347
8.754	6.035	1.41	1.132	1.254	0.8031	165.745												9.077	10.971	0.105	0.069	0.006	0.692919	122.505
9.161	5.465	0.029	0.028	0.0006347	0.96091	90												4.422	11.014	0.052	0.042	0.002	0.941745	145.638
14.376	5.476	0.058	0.055	0.002	0.75698	174.178												4.335	11.091	0.241	0.154	0.029	0.635732	166.404
5.261	5.477	0.046	0.037	0.001	0.60172	19.215												8.116	11.046	0.09	0.069	0.005	0.78595	20.636
2.875	5.481	0.03	0.029	0.0006744	0.954081	61.448												7.721	11.049	0.05	0.039	0.002	1.01859	6.1
4.756	5.493	0.059	0.052	0.002	0.731537	90												7.449	11.082	0.091	0.088	0.006	0.922526	39.483
5.347	5.501	0.066	0.06	0.003	0.876887	6.618												7.996	11.195	0.174	0.155	0.021	0.883143	160.632
22.405	5.539	0.077	0.075	0.005	1.07374	153.245												4.443	11.211	0.063	0.057	0.003	0.962388	96.762
21.449	5.52	0.028	0.026	0.0005686	0.923423	81.52
9.211	5.538	0.058	0.058	0.003	1.13547	0
14.586	5.557	0.107	0.084	0.007	0.778468	7.893
16.75	5.553	0.077	0.066	0.004	0.858991	72.59
6.224	5.538	0.037	0.034	0.0009785	0.910055	106.748
15.235	5.549	0.019	0.015	0.0002248	0.792865	164.828
10.827	5.579	0.074	0.066	0.004	0.930051	11.455
15.587	5.594	0.023	0.02	0.000357	0.859256	99.741
15.231	5.595	0.02	0.02	0.0003041	0.96798	0
5.251	5.605	0.024	0.023	0.0004496	0.993834	90
22.191	5.617	0.035	0.034	0.0009388	0.975769	0
15.188	5.636	0.059	0.052	0.002	0.731537	0
5.238	5.682	0.119	0.109	0.01	0.899117	162.047
4.979	5.647	0.03	0.029	0.0006876	0.972755	138.405
6.029	5.647	0.03	0.028	0.0006612	0.935407	90
14.327	5.673	0.029	0.028	0.0006479	0.980894	113.112
14.388	5.69	0.063	0.059	0.003	0.962388	45.019
9.549	5.68	0.03	0.03	0.0006876	0.972755	0
5.393	5.719	0.092	0.079	0.006	0.90258	137.247
5.615	5.705	0.069	0.061	0.003	0.802293	168.171
7.004	5.689	0.029	0.026	0.0005818	0.880821	0
15.132	5.693	0.031	0.027	0.0006479	0.85841	0
4.937	5.697	0.029	0.026	0.0005818	0.880821	59.743
15.048	5.716	0.058	0.047	0.002	0.75698	43.546
9.345	5.709	0.03	0.03	0.0006876	0.972755	0
5.307	5.764	0.048	0.042	0.002	1.10524	54.072
5.532	5.779	0.077	0.073	0.004	0.858991	39.325
15.773	5.787	0.091	0.069	0.005	0.768772	33.184
9.889	5.767	0.029	0.026	0.000595	0.900806	107.383
21.489	5.788	0.055	0.047	0.002	0.841811	131.234
9.448	5.789	0.029	0.028	0.0006347	0.96091	90
9.498	5.827	0.084	0.074	0.005	0.902239	49.854
5.744	5.874	0.162	0.152	0.019	0.921794	177.76
15.567	5.856	0.098	0.09	0.007	0.928017	111.921
10.367	5.829	0.032	0.032	0.0007934	0.986512	0
10.826	5.84	0.051	0.039	0.002	0.979038	62.376
5.295	5.838	0.039	0.034	0.001	0.837107	7.931
8.05	5.835	0.028	0.026	0.0005686	0.923423	30.054
16.576	5.859	0.068	0.06	0.003	0.826064	7.73
10.518	5.861	0.058	0.05	0.002	0.75698	54.001
9.594	5.85	0.034	0.03	0.0008066	0.888404	171.159
6.327	5.855	0.029	0.028	0.0006347	0.96091	90
13.884	5.869	0.029	0.028	0.0006479	0.980894	113.112
6.063	5.895	0.06	0.055	0.003	1.06103	143.432
10.266	5.884	0.034	0.029	0.0007669	0.844678	146.384
13.931	5.882	0.029	0.026	0.000595	0.900806	167.793
5.873	5.909	0.064	0.055	0.003	0.932548	136.75
5.989	5.899	0.029	0.028	0.0006347	0.96091	2.345e-12
6.936	6.012	0.27	0.251	0.053	0.925675	157.63
14.083	5.945	0.113	0.104	0.009	0.89742	103.585
6.849	5.9	0.027	0.012	0.0002512	0.438735	6.264
21.636	5.915	0.038	0.037	0.001	0.881745	0
15.967	5.916	0.032	0.029	0.0007273	0.904323	41.661
5.548	5.928	0.044	0.036	0.001	0.657665	152.479
6.11	5.933	0.027	0.026	0.0005554	0.970037	122.178
6.173	5.936	0.032	0.03	0.0007405	0.920736	15.222
14.266	5.993	0.061	0.053	0.003	1.02653	13.84
6.445	6.037	0.13	0.114	0.012	0.904075	91.486
10.88	5.999	0.031	0.031	0.0007405	0.981097	0
6.634	6.033	0.037	0.031	0.0008992	0.836302	44.968
9.749	6.083	0.09	0.088	0.006	0.94314	146.971
21.501	6.059	0.039	0.035	0.001	0.837107	107.997
6.717	6.08	0.046	0.031	0.001	0.60172	175.075
9.928	6.095	0.054	0.05	0.002	0.873278	45.011
9.612	6.128	0.113	0.098	0.009	0.89742	49.273
22.774	6.099	0.03	0.029	0.0006744	0.954081	61.448
22.49	6.127	0.031	0.029	0.0007008	0.928498	148.004
10.027	6.408	0.795	0.589	0.368	0.741351	171.917
22.867	6.144	0.029	0.027	0.0006215	0.940926	82.76
7.911	6.164	0.029	0.026	0.0005818	0.880821	90
7.029	6.185	0.062	0.062	0.003	0.993683	0
21.547	6.177	0.027	0.026	0.0005554	0.970037	147.822
7.102	6.195	0.04	0.031	0.0009653	0.768161	87.52
14.295	6.211	0.078	0.069	0.004	0.837107	160.184
10.471	6.231	0.108	0.089	0.007	0.764118	153.953
21.838	6.207	0.029	0.026	0.0005818	0.880821	90
9.535	6.253	0.075	0.048	0.003	0.679061	35.746
14.561	6.261	0.059	0.047	0.002	0.731537	51.103
22.082	6.282	0.106	0.095	0.008	0.906543	23.593
7.524	6.291	0.056	0.05	0.002	0.812015	0
16.157	6.282	0.029	0.026	0.0005818	0.880821	149.743
11.047	6.311	0.079	0.069	0.004	0.816048	88.118
10.757	6.492	0.459	0.414	0.15	0.906517	28.421
22.798	6.309	0.029	0.027	0.0006083	0.920941	90
22.865	6.329	0.03	0.028	0.0006479	0.916591	2.046
21.993	6.357	0.068	0.066	0.003	0.826064	38.202
21.694	6.346	0.029	0.028	0.0006479	0.980894	156.888
22.169	6.353	0.046	0.038	0.001	0.60172	86.609
22.515	6.346	0.029	0.029	0.0006612	1.00103	81.712
7.554	6.378	0.058	0.054	0.002	0.75698	176.089
7.795	6.406	0.096	0.045	0.003	0.414466	95.294
8.028	6.378	0.036	0.03	0.0008463	0.831437	0
7.912	6.431	0.145	0.065	0.007	0.423909	83.749
13.807	6.392	0.075	0.054	0.003	0.679061	0
14.331	6.417	0.121	0.107	0.01	0.86964	168.9
22.723	6.396	0.042	0.031	0.001	0.721791	8.888
22.931	6.403	0.031	0.029	0.0007008	0.928498	31.996
11.134	6.442	0.099	0.088	0.007	0.909364	155.114
9.523	6.459	0.126	0.109	0.011	0.882189	149.565
11.047	6.449	0.075	0.067	0.004	0.905415	111.847
7.628	6.441	0.045	0.04	0.001	0.62876	120.377
11.204	6.44	0.029	0.028	0.0006479	0.980894	66.888
8.005	6.496	0.117	0.085	0.008	0.744095	118.328
13.786	6.473	0.052	0.045	0.002	0.941745	91.94
23.012	6.464	0.027	0.026	0.0005554	0.970037	122.178
7.748	6.512	0.109	0.074	0.006	0.642996	169.173
16.041	6.51	0.051	0.044	0.002	0.979038	75.448
9.322	6.513	0.027	0.026	0.0005554	0.970037	90
11.08	6.535	0.077	0.075	0.005	1.07374	16.796
8.255	6.519	0.029	0.027	0.0006215	0.940926	6.71
15.583	6.524	0.045	0.037	0.001	0.62876	163.413
23.035	6.528	0.046	0.044	0.002	1.20344	45
8.198	6.56	0.087	0.068	0.005	0.841088	42.084
9.287	6.54	0.029	0.026	0.0005818	0.880821	0
9.385	6.556	0.059	0.056	0.003	1.0973	53.08
9.177	6.546	0.034	0.029	0.0007934	0.873865	155.824
8.266	6.551	0.029	0.026	0.000595	0.900806	12.207
11.438	6.553	0.032	0.03	0.0007537	0.937149	13.295
15.075	6.572	0.052	0.046	0.002	0.941745	145.327
8.308	6.589	0.068	0.057	0.003	0.826064	65.323
9.015	6.651	0.258	0.202	0.041	0.78425	4.619
7.816	6.593	0.049	0.039	0.001	0.530296	134.239
23.102	6.604	0.03	0.03	0.0006876	0.972755	0
8.253	6.62	0.055	0.047	0.002	0.841811	135
8.791	6.659	0.137	0.096	0.01	0.678374	121.663
14.081	6.64	0.084	0.082	0.005	0.902239	110.067
7.915	6.622	0.029	0.026	0.0005818	0.880821	90
8.164	6.674	0.154	0.103	0.012	0.644243	155.32
22.105	6.662	0.108	0.099	0.008	0.873278	157.69
15.654	6.631	0.029	0.026	0.000595	0.900806	167.793
22.653	6.674	0.03	0.028	0.0006479	0.916591	92.046
10.553	6.753	0.258	0.19	0.038	0.726866	177.875
11.022	6.678	0.035	0.03	0.0008066	0.838363	107.413
9.785	6.737	0.182	0.141	0.02	0.768772	159.233
21.867	6.705	0.09	0.082	0.006	0.94314	20.567
22.498	6.746	0.17	0.146	0.019	0.837078	29.076
15.537	6.68	0.026	0.023	0.0004628	0.871679	166.356
13.878	6.695	0.045	0.031	0.001	0.62876	104.462
11.308	6.698	0.152	0.024	0.003	0.165327	4.369
14.797	6.706	0.058	0.052	0.002	0.75698	171.765
16.108	6.7	0.03	0.027	0.0006347	0.897917	0
11.036	6.767	0.146	0.101	0.012	0.71678	148.377
22.182	6.745	0.069	0.06	0.003	0.802293	158.725
8.61	6.762	0.09	0.072	0.005	0.78595	21.395
21.706	6.765	0.078	0.075	0.005	1.04638	124.394
8.825	6.749	0.03	0.03	0.0006876	0.972755	0
14.956	6.756	0.067	0.043	0.002	0.567271	177.322
10.179	6.761	0.047	0.043	0.002	1.15277	134.994
13.5	6.834	0.209	0.143	0.023	0.670418	126.926
11.556	6.773	0.033	0.03	0.0007669	0.896646	103.024
10.705	6.773	0.029	0.026	0.0005818	0.880821	0
16.118	6.775	0.029	0.026	0.0005818	0.880821	90
8.918	6.799	0.052	0.039	0.002	0.941745	77.669
9.085	6.849	0.159	0.071	0.009	0.453271	107.476
9.922	6.789	0.034	0.03	0.0008066	0.888404	172.214
14.342	7.218	1.116	0.876	0.768	0.785132	161.789
8.561	6.829	0.071	0.051	0.003	0.75773	128.954
10.719	6.834	0.025	0.023	0.0004496	0.915918	109.127
9.344	6.85	0.049	0.037	0.001	0.530296	83.251
11.747	6.851	0.029	0.026	0.0005818	0.880821	90
21.477	6.97	0.319	0.265	0.066	0.825796	179.163
10.78	6.87	0.028	0.026	0.0005686	0.923423	59.946
13.71	6.922	0.158	0.138	0.017	0.867051	16.129
11.96	6.977	0.264	0.209	0.043	0.785544	146.846
12.138	6.901	0.068	0.068	0.004	1.10142	8.105
11.65	6.926	0.099	0.09	0.007	0.909364	167.519
11.564	6.927	0.075	0.068	0.004	0.905415	91.127
13.219	7.074	0.393	0.336	0.104	0.85735	163.94
13.568	7.01	0.174	0.119	0.016	0.672871	126.087
23.346	6.95	0.032	0.03	0.0007405	0.920736	108.311
11.775	7.003	0.136	0.107	0.011	0.757225	150.935
11.521	7.003	0.072	0.068	0.004	0.982438	136.553
22.327	7.012	0.051	0.051	0.002	0.979038	0
22.252	7.01	0.047	0.042	0.002	1.15277	15.11
11.667	7.03	0.095	0.07	0.005	0.705396	164.479
15.522	7.325	0.862	0.692	0.469	0.803653	172.345
12.584	7.011	0.031	0.03	0.0007273	0.963608	70.813
23.301	7.356	0.784	0.708	0.436	0.90316	166.096
23.709	7.013	0.029	0.026	0.0005818	0.880821	0
15.059	7.05	0.053	0.035	0.001	0.453271	136.347
24.355	7.052	0.03	0.029	0.0006744	0.954081	61.448
12.69	7.057	0.03	0.029	0.0006876	0.972755	134.989
23.984	7.093	0.098	0.09	0.007	0.928017	170.865
11.767	7.074	0.029	0.026	0.000595	0.900806	12.207
11.664	7.093	0.049	0.031	0.001	0.530296	154.765
23.715	7.098	0.027	0.026	0.0005554	0.970037	90
15.008	7.115	0.064	0.045	0.002	0.621699	32.151
24.47	7.208	0.227	0.204	0.036	0.889531	74.528
12.297	7.18	0.185	0.147	0.021	0.781243	9.102
22.056	7.152	0.097	0.079	0.006	0.811929	7.475
24.306	7.147	0.029	0.026	0.000595	0.900806	12.207
24.1	7.157	0.028	0.026	0.0005686	0.923423	81.52
12.138	7.177	0.065	0.053	0.003	0.904075	74.888
12.946	7.161	0.029	0.028	0.0006479	0.980894	23.112
24.6	7.163	0.03	0.029	0.0006876	0.972755	80.085
12.84	7.175	0.044	0.044	0.002	1.31533	0
13.726	7.166	0.029	0.026	0.000595	0.900806	45.002
12.651	7.188	0.031	0.03	0.0007273	0.963608	52.854
13.664	7.193	0.029	0.026	0.0005818	0.880821	90
24.641	7.208	0.039	0.034	0.001	0.837107	124.803
23.955	7.219	0.047	0.043	0.002	1.15277	53.409
12.391	7.226	0.029	0.026	0.000595	0.900806	77.793
24.189	7.226	0.03	0.027	0.0006347	0.897917	147.283
12.215	7.244	0.03	0.028	0.0006612	0.935407	45.004
16.106	7.262	0.063	0.059	0.003	0.962388	45.019
22.586	7.259	0.029	0.027	0.0006083	0.920941	60.972
12.48	7.433	0.558	0.345	0.151	0.617474	177.217
24.135	7.29	0.061	0.057	0.003	1.02653	45
24.063	7.281	0.031	0.028	0.0006876	0.911009	162.8
13.503	7.339	0.187	0.136	0.02	0.72821	156.54
23.804	7.288	0.053	0.039	0.002	0.906543	170.041
24.655	7.291	0.042	0.036	0.001	0.721791	90
13.259	7.302	0.028	0.027	0.000595	0.966298	60.307
12.917	7.319	0.061	0.053	0.003	1.02653	101.334
24.196	7.315	0.056	0.048	0.002	0.812015	41.419
24.739	7.31	0.045	0.037	0.001	0.62876	157.818
23.989	7.338	0.088	0.078	0.005	0.822081	98.337
21.731	7.316	0.03	0.03	0.0006876	0.972755	0
14.964	7.33	0.048	0.044	0.002	1.10524	81.896
23.688	7.322	0.033	0.029	0.0007537	0.881213	1.32
24.559	7.477	0.383	0.255	0.077	0.668349	52.899
24.284	7.331	0.03	0.028	0.0006744	0.954081	74.765
22.715	7.349	0.029	0.026	0.0005818	0.880821	90
22	7.401	0.126	0.115	0.011	0.882189	166.021
14.965	7.378	0.032	0.027	0.0006744	0.838548	46.458
24.096	7.58	0.576	0.428	0.193	0.740666	157.993
21.653	7.404	0.067	0.058	0.003	0.850906	114.163
13.663	7.409	0.064	0.058	0.003	0.932548	141.247
19.662	7.419	0.069	0.061	0.003	0.802293	96.048
24.341	7.407	0.029	0.028	0.0006347	0.96091	45.041
22.372	7.42	0.039	0.035	0.001	0.837107	105.558
14.987	7.425	0.038	0.034	0.001	0.881745	78.802
20.342	7.452	0.067	0.06	0.003	0.850906	14.556
20.481	7.455	0.065	0.052	0.003	0.904075	172.753
20.58	7.447	0.029	0.026	0.000595	0.900806	102.207
21.842	7.449	0.038	0.031	0.0009256	0.816143	135
20.752	7.463	0.048	0.039	0.001	0.552621	165.902
22.46	7.46	0.035	0.032	0.0008727	0.907066	157.177
19.793	7.468	0.043	0.04	0.001	0.68861	7.445
20.91	7.466	0.031	0.03	0.0007273	0.963608	70.813
20.637	7.473	0.029	0.028	0.0006479	0.980894	23.112
21.874	7.481	0.029	0.026	0.000595	0.900806	45.002
15.021	7.557	0.218	0.171	0.029	0.776954	4.436
17.031	7.486	0.036	0.032	0.0008992	0.883408	18.135
17.087	7.491	0.041	0.036	0.001	0.75743	44.573
14.155	7.552	0.126	0.109	0.011	0.882189	151.958
14.824	7.526	0.026	0.024	0.0004893	0.921592	116.075
16.958	7.539	0.048	0.033	0.001	0.552621	69.199
22.18	7.571	0.129	0.114	0.012	0.918146	0
13.644	7.533	0.029	0.026	0.0005818	0.880821	0
14.311	7.576	0.11	0.071	0.006	0.631358	147.982
14.796	7.558	0.04	0.034	0.001	0.795775	10.333
20.524	7.56	0.071	0.047	0.003	0.75773	8.844
16.314	7.572	0.055	0.051	0.002	0.841811	169.408
21.607	7.588	0.085	0.081	0.005	0.881135	37.223
13.67	7.57	0.036	0.034	0.0009653	0.948347	12.918
21.169	7.578	0.045	0.039	0.001	0.62876	0
22.021	7.586	0.057	0.053	0.002	0.783773	11.452
18.049	7.657	0.192	0.18	0.027	0.932548	139.926
20.042	7.603	0.077	0.065	0.004	0.858991	65.817
14.026	7.618	0.104	0.052	0.004	0.470873	125.701
14.636	7.592	0.038	0.03	0.0009124	0.804504	79.751
20.993	7.596	0.045	0.042	0.002	1.25752	140.442
22.654	7.975	0.994	0.762	0.595	0.766751	155.076
23.771	7.614	0.091	0.066	0.005	0.768772	15.328
15.178	7.609	0.055	0.044	0.002	0.841811	150.733
19.017	7.634	0.093	0.081	0.006	0.883274	111.101
16.877	7.607	0.03	0.029	0.0006876	0.972755	45
20.531	7.611	0.04	0.032	0.001	0.795775	0
14.092	7.623	0.051	0.042	0.002	0.979038	43.614
16.444	7.903	0.781	0.591	0.362	0.755643	170.812
16.817	7.622	0.03	0.029	0.0006744	0.954081	67.12
12.336	7.625	0.034	0.03	0.0007934	0.873865	0
13.721	7.639	0.045	0.041	0.001	0.62876	138.048
16.924	7.673	0.125	0.073	0.007	0.570411	50.123
17.16	7.64	0.03	0.029	0.0006876	0.972755	9.915
20.552	7.672	0.054	0.049	0.002	0.873278	41.456
21.743	7.701	0.133	0.113	0.012	0.86375	174.512
21.615	7.67	0.029	0.027	0.0006215	0.940926	173.29
21.502	7.678	0.044	0.031	0.001	0.657665	117.668
20.814	7.681	0.03	0.027	0.0006347	0.897917	163.515
18.221	7.687	0.039	0.033	0.001	0.837107	90
19.835	7.686	0.034	0.028	0.0007537	0.830139	155.613
14.56	7.705	0.07	0.054	0.003	0.779534	148.978
23.763	7.739	0.136	0.119	0.013	0.894902	32.392
20.355	7.726	0.101	0.089	0.007	0.873706	157.828
20.484	7.703	0.029	0.026	0.000595	0.900806	12.207
20.878	7.705	0.029	0.026	0.000595	0.900806	102.207
23.159	7.752	0.099	0.092	0.007	0.909364	157.239
23.367	7.738	0.085	0.069	0.005	0.881135	168.766
23.896	7.767	0.136	0.11	0.012	0.826064	18.154
20.761	7.752	0.074	0.065	0.004	0.930051	31.63
14.729	7.801	0.194	0.102	0.015	0.507455	156.549
18.187	7.773	0.105	0.092	0.008	0.923893	163.769
14.912	7.752	0.039	0.032	0.0009917	0.830159	168.891
19.964	7.754	0.03	0.029	0.0006744	0.954081	151.448
17.908	7.756	0.029	0.028	0.0006479	0.980894	66.888
22.069	7.768	0.031	0.031	0.0007405	0.981097	0
23.462	7.767	0.037	0.031	0.0008992	0.836302	0
14.96	7.778	0.042	0.037	0.001	0.721791	93.27
19.918	7.809	0.109	0.1	0.009	0.964494	128.426
15.535	7.775	0.029	0.028	0.0006347	0.96091	2.345e-12
21.679	7.788	0.055	0.051	0.002	0.841811	172.366
17.845	7.794	0.058	0.05	0.002	0.75698	163.272
15.779	7.809	0.067	0.06	0.003	0.850906	102.719
20.401	7.815	0.083	0.075	0.005	0.924111	9.145
18.104	7.798	0.028	0.027	0.0006083	0.987897	90
24.324	7.799	0.035	0.032	0.000886	0.92089	70.074
17.065	7.8	0.034	0.03	0.0007934	0.873865	169.901
23.269	7.809	0.048	0.04	0.002	1.10524	136.817
24.018	7.8	0.03	0.029	0.0006744	0.954081	156.801
23.124	7.834	0.071	0.065	0.004	1.01031	163.146
15.706	7.867	0.126	0.11	0.011	0.882189	88.761
21.467	7.836	0.07	0.061	0.003	0.779534	0
15.382	7.84	0.053	0.053	0.002	0.906543	0
16.922	7.833	0.029	0.027	0.0006083	0.920941	113.08
18.184	7.84	0.077	0.03	0.002	0.429496	161.027
21.596	7.844	0.044	0.044	0.002	1.31533	0
23.372	7.837	0.032	0.028	0.000714	0.887786	45.002
18.575	8.025	0.442	0.293	0.102	0.664761	124.612
23.786	7.922	0.28	0.145	0.032	0.51969	171.129
17.009	7.878	0.108	0.081	0.007	0.764118	164.056
19.216	7.863	0.055	0.047	0.002	0.841811	49.848
21.409	7.854	0.029	0.026	0.000595	0.900806	77.793
23.961	7.869	0.058	0.038	0.002	0.75698	121.468
17.131	7.863	0.033	0.03	0.0007802	0.912196	97.275
21.319	7.893	0.089	0.088	0.006	0.964454	118.26
21.964	7.903	0.119	0.087	0.008	0.719294	59.825
23.244	7.865	0.03	0.03	0.0006876	0.972755	0
15.908	7.865	0.027	0.023	0.000476	0.831361	180
15.049	7.894	0.076	0.06	0.004	0.881745	98.519
15.999	7.9	0.082	0.067	0.004	0.75743	5.048
18.302	7.882	0.029	0.026	0.0005818	0.880821	0
17.277	8.09	0.583	0.437	0.2	0.749209	11.797
24.224	7.891	0.031	0.03	0.0007273	0.963608	70.813
20.404	7.895	0.023	0.023	0.0004231	1.01835	0
23.202	7.98	0.193	0.129	0.02	0.683637	94.082
20.178	7.918	0.048	0.041	0.002	1.10524	44.594
20.608	7.938	0.09	0.074	0.005	0.78595	162.181
23.531	8.037	0.289	0.178	0.04	0.609782	84.004
19.932	7.929	0.027	0.026	0.0005554	0.970037	0
23.956	7.938	0.025	0.023	0.0004628	0.942808	134.998
24.057	7.938	0.037	0.031	0.0008992	0.836302	179.791
18.327	7.951	0.029	0.026	0.0005818	0.880821	0
20.87	7.99	0.122	0.102	0.01	0.855442	27.437
14.969	7.972	0.042	0.035	0.001	0.721791	45.002
24.027	7.984	0.054	0.05	0.002	0.873278	95.049
19.316	8.021	0.161	0.127	0.016	0.78592	171.579
22	7.982	0.052	0.045	0.002	0.941745	0
20.688	8.018	0.091	0.087	0.006	0.922526	147.69
24.114	7.989	0.031	0.031	0.0007405	0.981097	90
20.066	7.993	0.029	0.028	0.0006347	0.96091	90
24.178	7.993	0.03	0.03	0.0006876	0.972755	0
15.16	7.996	0.03	0.029	0.0006876	0.972755	170.085
15.84	8.037	0.116	0.113	0.01	0.946224	121.763
18.334	8.022	0.097	0.06	0.005	0.676607	120.715
21.053	8.008	0.028	0.026	0.0005686	0.923423	120.054
15.013	8.018	0.048	0.031	0.001	0.552621	110.1
21.007	8.018	0.06	0.046	0.002	0.707355	0
21.923	8.024	0.054	0.049	0.002	0.873278	85.9
23.944	8.013	0.028	0.028	0.000595	0.966298	0
16.833	8.024	0.029	0.026	0.0005818	0.880821	0
20.235	8.025	0.029	0.026	0.0005818	0.880821	90
23.818	8.044	0.068	0.065	0.003	0.826064	117.231
15.932	8.03	0.029	0.029	0.0006612	1.00103	98.288
15.7	8.114	0.167	0.157	0.021	0.95873	68.57
24.299	8.048	0.03	0.029	0.0006744	0.954081	118.552
17.644	8.065	0.041	0.037	0.001	0.75743	134.996
21.201	8.089	0.085	0.081	0.005	0.881135	36.849
24.044	8.069	0.072	0.044	0.002	0.491219	14.319
23.935	8.073	0.03	0.03	0.0006876	0.972755	0
19.131	8.094	0.066	0.059	0.003	0.876887	98.162
20.136	8.089	0.049	0.033	0.001	0.530296	79.435
20.686	8.081	0.035	0.034	0.0009521	0.989593	122.005
20.533	8.128	0.125	0.117	0.011	0.896361	4.467
20.79	8.119	0.091	0.085	0.006	0.922526	139.362
21.835	8.225	0.374	0.228	0.067	0.609876	28.693
22.097	8.091	0.034	0.03	0.0008198	0.902943	164.747
24.273	8.091	0.032	0.032	0.0007934	0.986512	0
15.552	8.105	0.047	0.043	0.002	1.15277	134.994
23.828	8.098	0.042	0.03	0.001	0.721791	3.147
24.165	8.107	0.028	0.027	0.0006083	0.987897	90
21.327	8.139	0.09	0.076	0.005	0.78595	156.259
23.913	8.115	0.04	0.031	0.0009653	0.768161	27.361
24.193	8.138	0.118	0.044	0.004	0.365768	30.707
21.034	8.131	0.066	0.053	0.003	0.876887	5.388e-14
17.642	8.138	0.059	0.052	0.002	0.731537	0
18.456	8.174	0.093	0.079	0.006	0.883274	149.116
21.09	8.149	0.037	0.03	0.0008727	0.811655	165.134
16.059	8.152	0.031	0.029	0.0007008	0.928498	58.004
22.147	8.17	0.063	0.057	0.003	0.962388	64.836
22.224	8.214	0.129	0.114	0.011	0.841634	74.635
19.613	8.173	0.046	0.037	0.001	0.60172	147.655
19.335	8.353	0.407	0.376	0.12	0.922364	162.292
21.636	8.193	0.067	0.06	0.003	0.850906	12.936
23.84	8.19	0.05	0.049	0.002	1.01859	45.022
16.149	8.204	0.065	0.045	0.002	0.602717	99.348
17.709	8.189	0.042	0.034	0.001	0.721791	136.982
20.642	8.212	0.092	0.084	0.006	0.90258	22.948
24.073	8.189	0.042	0.034	0.001	0.721791	136.982
18.327	8.191	0.029	0.026	0.000595	0.900806	167.793
20.816	8.194	0.027	0.026	0.0005554	0.970037	32.178
16.796	8.201	0.031	0.031	0.0007405	0.981097	0
23.939	8.202	0.033	0.029	0.0007669	0.896646	57.695
19.98	8.206	0.029	0.027	0.0006215	0.940926	97.24
23.673	8.214	0.052	0.045	0.002	0.941745	1.94
16.467	8.215	0.029	0.026	0.000595	0.900806	77.793
23.564	8.239	0.12	0.081	0.008	0.707355	1.841
18.915	8.299	0.176	0.166	0.023	0.945394	135.444
23.196	8.232	0.029	0.028	0.0006347	0.96091	180
18.333	8.249	0.054	0.05	0.002	0.873278	5.049
19.905	8.271	0.051	0.045	0.002	0.979038	38.032
20.915	8.311	0.146	0.12	0.014	0.836243	25.956
21.506	8.306	0.12	0.105	0.01	0.884194	41.753
21.284	8.276	0.042	0.036	0.001	0.721791	0
22.349	8.37	0.248	0.117	0.023	0.47614	86.393
16.662	8.302	0.084	0.074	0.005	0.902239	23.061
21.992	8.313	0.101	0.091	0.007	0.873706	47.118
21.025	8.282	0.029	0.026	0.0005818	0.880821	0
18.41	8.326	0.12	0.111	0.01	0.884194	151.743
20.049	8.287	0.029	0.026	0.000595	0.900806	77.793
22.126	8.299	0.058	0.051	0.002	0.75698	14.696
23.213	8.288	0.031	0.028	0.0006744	0.89352	71.609
23.706	8.287	0.031	0.031	0.0007405	0.981097	90
16.219	8.291	0.029	0.028	0.0006479	0.980894	66.888
16.917	8.306	0.069	0.054	0.003	0.802293	10.044
17.676	8.341	0.148	0.118	0.014	0.813794	1.435
17.038	8.314	0.06	0.05	0.002	0.707355	25.453
18.302	8.317	0.029	0.027	0.0006215	0.940926	6.71
16.986	8.323	0.038	0.031	0.0009256	0.816143	7.702
20.79	8.361	0.09	0.072	0.005	0.78595	22.178
16.415	8.364	0.081	0.059	0.004	0.776247	5.534e-14
16.919	8.356	0.048	0.039	0.001	0.552621	14.098
21.155	8.378	0.098	0.083	0.006	0.795443	20.625
21.429	8.353	0.029	0.028	0.0006479	0.980894	156.888
17.172	8.376	0.071	0.05	0.003	0.75773	150.179
19.06	8.36	0.024	0.023	0.0004496	0.993834	0
20.525	8.417	0.184	0.135	0.02	0.75215	3.61
22.913	8.375	0.044	0.044	0.002	1.31533	0
19.974	8.382	0.045	0.044	0.002	1.25752	151.233
20.202	8.409	0.075	0.063	0.004	0.905415	60.719
22.052	8.389	0.029	0.028	0.0006479	0.980894	113.112
19.066	8.4	0.029	0.028	0.0006215	0.940926	51.497
20.707	8.415	0.053	0.039	0.002	0.906543	178.409
18.383	8.431	0.04	0.034	0.001	0.795775	105.92
18.283	8.481	0.128	0.097	0.01	0.777124	51.505
20.867	8.43	0.027	0.026	0.0005554	0.970037	32.178
17.809	8.448	0.033	0.029	0.0007537	0.881213	91.32
18.85	8.455	0.054	0.046	0.002	0.873278	14.984
22.145	8.457	0.051	0.051	0.002	0.979038	0
20.8	8.562	0.279	0.188	0.041	0.670634	19.745
21.167	8.524	0.173	0.133	0.018	0.765756	34.649
21.578	8.481	0.029	0.028	0.0006347	0.96091	2.345e-12
22.009	8.552	0.198	0.132	0.021	0.682023	39.83
21.356	8.502	0.03	0.03	0.0006876	0.972755	0
20.034	8.508	0.045	0.037	0.001	0.62876	15.165
21.697	8.53	0.056	0.044	0.002	0.812015	103.07
21.441	8.578	0.151	0.12	0.014	0.781779	86.177
21.816	8.598	0.101	0.09	0.007	0.873706	134.579
20.04	8.571	0.03	0.029	0.0006876	0.972755	64.021
22.182	8.571	0.038	0.029	0.0008727	0.769499	27.446
21.294	8.579	0.03	0.029	0.0006876	0.972755	45
21.252	8.603	0.052	0.048	0.002	0.941745	45
20.599	8.654	0.06	0.052	0.002	0.707355	20.634
20.408	8.704	0.134	0.06	0.006	0.425453	47.633
20.528	8.714	0.105	0.088	0.007	0.808406	160.604
21.335	8.789	0.03	0.03	0.0006876	0.972755	0
20.803	8.816	0.051	0.037	0.001	0.489519	87.507
21.125	8.859	0.067	0.045	0.002	0.567271	63.297
